# Supplementary material for: Specifying ICD9, ICPC and ATC codes for the STOPP/START criteria: a multidisciplinary consensus panel
Source: Oxford University Press journal article supplement (doi:10.1093/ageing/afu075), 2014-06-24
Supplement: afu075_supplementary_data.zip [file afu075_supplementary_data.zip]

Archive with 3 entries (3 files):
- afu075supp_data1.pdf
- afu075supp_data3.pdf
- afu075supp_data2.pdf
