# Supplementary material for: Specifying ICD9, ICPC and ATC codes for the STOPP/START criteria: a multidisciplinary consensus panel
Source: Oxford University Press journal article supplement (doi:10.1093/ageing/afu075), 2014-06-24
Supplement: afu075_supplementary_data.zip [file afu075_supplementary_data.zip › afu075supp_data1.pdf]

## Appendix 1a Overview of the Dutch and original Irish STOPP criteria versions and its differences.

| Dutch STOPP criteria | Subject                                                                                               | Irish STOPP criteria | Differences                                                          |
|----------------------|-------------------------------------------------------------------------------------------------------|----------------------|----------------------------------------------------------------------|
| A1                   | Digoxin at a long-term dose > 125 ug/day with impaired renal function                                 | A1                   | -                                                                    |
| A2                   | Loop diuretic for dependent ankle oedema only, i.e. no clinical signs of heart failure                | A2                   | -                                                                    |
| A3                   | Loop diuretic as first-line monotherapy for hypertension.                                             | A3                   | -                                                                    |
| A4                   | Thiazide diuretic with a history of gout                                                              | A4                   | -                                                                    |
| A5                   | Noncardioselective $\beta$ -blocker with chronic obstructive pulmonary disease (COPD)                 | A5                   | -                                                                    |
| A6                   | $\beta$ -blocker in combination with verapamil                                                        | A6                   | -                                                                    |
| A7                   | Use of diltiazem or verapamil with NYHA Class II or IV heart failure                                  | A7                   | -                                                                    |
| A8                   | Calcium channel blockers with chronic constipation                                                    | A8                   | -                                                                    |
| A9                   | Salicylates at dose > 160 mg/day                                                                      | A12                  | Salicylates instead of only aspirin and dose 160mg instead of 150 mg |
| A10                  | Salicylates with no history of coronary, cerebral or peripheral vascular symptoms or occlusive event. | A13                  | Salicylates instead of only aspirin                                  |
| A11                  | Salicylates to treat dizziness not clearly attributable to cerebrovascular disease                    | A14                  | Salicylates instead of only aspirin                                  |
| A12                  | Dipyridamole as monotherapy for cardiovascular secondary prevention                                   | A10                  | -                                                                    |
| A13                  | Oral anticoagulants for first, uncomplicated deep venous thrombosis for > 6 months' duration          | A15                  | -                                                                    |
| A14                  | Oral anticoagulants for first, uncomplicated pulmonary embolus for > 12 months' duration              | A16                  | -                                                                    |
| A15                  | Platelet aggregation inhibitors or oral anticoagulants with concurrent bleeding disorder.             | A17                  | -                                                                    |
| B1                   | Tricyclic antidepressants (TCAs) with dementia                                                        | B1                   | -                                                                    |
| B2                   | TCAs with glaucoma                                                                                    | B2                   | -                                                                    |

|            |                                                                                                                              |            |                                                                  |
|------------|------------------------------------------------------------------------------------------------------------------------------|------------|------------------------------------------------------------------|
| <b>B3</b>  | TCAs with cardiac conductive abnormalities                                                                                   | <b>B3</b>  | -                                                                |
| <b>B4</b>  | TCAs with constipation                                                                                                       | <b>B4</b>  | -                                                                |
| <b>B5</b>  | TCAs with prostatism or prior history of urinary retention                                                                   | <b>B6</b>  | -                                                                |
| <b>B6</b>  | TCAs with an opiate or calcium channel blocker                                                                               | <b>B5</b>  | -                                                                |
| <b>B7</b>  | Long-acting benzodiazepines for > 1 month duration                                                                           | <b>B7</b>  | -                                                                |
| <b>B8</b>  | Neuroleptics in those with parkinsonism                                                                                      | <b>B9</b>  | Exclusion of 'long-term (>1 month)'                              |
| <b>B9</b>  | Neuroleptics for > 1 month duration                                                                                          | <b>B8</b>  | Exclusion of 'as long-term hypnotics'                            |
| <b>B10</b> | Phenothiazines in patients with epilepsy                                                                                     | <b>B10</b> | -                                                                |
| <b>B11</b> | Anticholinergics to treat extrapyramidal side-effects of neuroleptic medications.                                            | <b>B11</b> | -                                                                |
| <b>B12</b> | Selective serotonin re-uptake inhibitors (SSRIs) with a history of clinically significant hyponatraemia in the past 2 months | <b>B12</b> | Addition of 'past 2 months'                                      |
| <b>B13</b> | First-generation antihistamines for > 1 week duration                                                                        | <b>B13</b> | -                                                                |
| <b>C1</b>  | Loperamide or codeine phosphate for treatments of diarrhea of unknown cause.                                                 | <b>C1</b>  | Exclusion of diphenoxylate (not available in the Netherlands)    |
| <b>C2</b>  | Loperamide or codeine phosphate for treatment of severe infective gastroenteritis.                                           | <b>C2</b>  | Exclusion of diphenoxylate                                       |
| <b>C3</b>  | Metoclopramide with parkinsonism                                                                                             | <b>C3</b>  | Exclusion of prochlorperazine (not available in the Netherlands) |
| <b>C4</b>  | PPI for peptic ulcer disease at full therapeutic dosage for > 8 weeks.                                                       | <b>C4</b>  | -                                                                |
| <b>C5</b>  | Anticholinergic antispasmodic drugs with chronic constipation                                                                | <b>C5</b>  | -                                                                |
| <b>D1</b>  | Theophylline as monotherapy for COPD                                                                                         | <b>D1</b>  | -                                                                |
| <b>D2</b>  | Systemic corticosteroids instead of inhaled corticosteroids for maintenance therapy in moderate-severe COPD                  | <b>D2</b>  | -                                                                |
| <b>D3</b>  | Ipratropium or tiotropium with glaucoma                                                                                      | <b>D3</b>  | Addition of tiotropium                                           |
| <b>E1</b>  | Nonsteroidal anti-inflammatory drug (NSAID) with moderate-severe hypertension                                                | <b>E2</b>  | -                                                                |
| <b>E2</b>  | NSAID with heartfailure                                                                                                      | <b>E3</b>  | -                                                                |
| <b>E3</b>  | NSAID with chronic renal failure                                                                                             | <b>E6</b>  | -                                                                |

|           |                                                                                                                                             |           |                                                                                                     |
|-----------|---------------------------------------------------------------------------------------------------------------------------------------------|-----------|-----------------------------------------------------------------------------------------------------|
| <b>E4</b> | NSAID use for > 3 months for symptom relief of mild osteoarthritis                                                                          | <b>E4</b> | -                                                                                                   |
| <b>E5</b> | NSAID use for > 3 months for chronic treatment of gout where there is no contraindication for or proven ineffectiveness of allopurinol      | <b>E8</b> | Part of original STOPP criterion E8, (NSAID part) Addition of 'ineffectiveness of allopurinol'      |
| <b>E6</b> | Corticosteroids use for > 3 months as monotherapy for rheumatoid arthritis or osteoarthritis.                                               | <b>E7</b> | -                                                                                                   |
| <b>E7</b> | Colchicine use for > 3 months for chronic treatment of gout where there is no contraindication for or proven ineffectiveness of allopurinol | <b>E8</b> | Part of original STOPP criterion E8, (colchicine part) Addition of 'ineffectiveness of allopurinol' |
| <b>F1</b> | Urogenital anticholinergic drugs with dementia                                                                                              | <b>F1</b> | -                                                                                                   |
| <b>F2</b> | Urogenital anticholinergic drugs with chronic glaucoma                                                                                      | <b>F2</b> | -                                                                                                   |
| <b>F3</b> | Urogenital anticholinergic drugs with chronic constipation                                                                                  | <b>F3</b> | -                                                                                                   |
| <b>F4</b> | Urogenital anticholinergic drugs with chronic prostatism                                                                                    | <b>F4</b> | -                                                                                                   |
| <b>F5</b> | Selective $\alpha$ -1 blockers in men with frequent incontinence, i.e. one or more episodes of incontinence daily.                          | <b>F5</b> | -                                                                                                   |
| <b>F6</b> | Selective $\alpha$ -1 blockers with a urinary catheter in situ for > 2 months                                                               | <b>F6</b> | -                                                                                                   |
| <b>G1</b> | Glibenclamide with type 2 diabetes mellitus                                                                                                 | <b>G1</b> | Exclusion of chlorpropamide                                                                         |
| <b>G2</b> | Noncardioselective $\beta$ -blocker in those with diabetes mellitus and frequent hypoglycaemic episodes, i.e. > 1 episode per month.        | <b>G2</b> | Addition of noncardioselective                                                                      |
| <b>G3</b> | Oestrogens with a history of breast cancer                                                                                                  | <b>G3</b> | Part of original STOPP criterion G3 (breast cancer part)                                            |
| <b>G4</b> | Oestrogens with a history of venous thromboembolism.                                                                                        | <b>G3</b> | Part of original STOPP criterion G3 (venous thromboembolism part)                                   |
| <b>G5</b> | Oestrogens without progestogen in patients with intact uterus.                                                                              | <b>G4</b> | -                                                                                                   |
| <b>H1</b> | Benzodiazepines with a history of falling or tendency to fall                                                                               | <b>H1</b> | -                                                                                                   |
| <b>H2</b> | Neuroleptic drugs with a history of falling or tendency to fall                                                                             | <b>H2</b> | -                                                                                                   |
| <b>H3</b> | First-generation antihistamines with a history of falling or tendency to fall                                                               | <b>H3</b> | -                                                                                                   |

|              |                                                                                                                                            |                          |                         |
|--------------|--------------------------------------------------------------------------------------------------------------------------------------------|--------------------------|-------------------------|
| <b>H4</b>    | Opiates with a history of falling or tendency to fall                                                                                      | <b>H5</b>                | -                       |
| <b>H5</b>    | Vasodilator drugs with persistent postural hypotension                                                                                     | <b>H4</b>                | -                       |
| <b>I1</b>    | Use of long-term opiates as first-line therapy for mild-moderate pain.                                                                     | <b>I1</b>                | Exclusion of 'powerful' |
| <b>I2</b>    | Use of long-term opiates in those with dementia unless indicted for palliative care or management of moderate-severe chronic pain syndrome | <b>I3</b>                | -                       |
| <b>J</b>     | Duplicate drug class prescription                                                                                                          | <b>J</b>                 | -                       |
| <b>TOTAL</b> | <b>62 STOPP criteria</b>                                                                                                                   | <b>65 STOPP criteria</b> |                         |

#### Appendix 1b Overview of the Dutch and original Irish START criteria versions and its differences.

| Dutch START criteria | Subject                                                                                                                                             | Irish START criteria | Differences                                 |
|----------------------|-----------------------------------------------------------------------------------------------------------------------------------------------------|----------------------|---------------------------------------------|
| <b>A1</b>            | Angiotensin converting enzyme (ACE) inhibitor or when side-effects an angiotensin II receptor blocker with chronic heart failure                    | <b>A6</b>            | Addition of angiotensin II receptor blocker |
| <b>A2</b>            | ACE inhibitor or when side-effects an angiotensin II receptor blocker in diabetes mellitus patients with proteinuria and > 10 years life expectancy | <b>F2</b>            | Addition of '> 10 years life expectancy'    |
| <b>A3</b>            | ACE inhibitor or when side-effects an angiotensin II receptor blocker following acute myocardial infarction                                         | <b>A7</b>            | Addition of angiotensin II receptor blocker |
| <b>A4</b>            | Statin therapy with a documented history of coronary, cerebral or peripheral vascular disease and > 5 years life expectancy.                        | <b>A5</b>            | -                                           |
| <b>A5</b>            | Antihypertensive therapy where systolic blood pressure consistently > 160 mmHg                                                                      | <b>A4</b>            | -                                           |
| <b>A6</b>            | Diuretics with chronic heart failure                                                                                                                | -                    | Extra START criterion                       |
| <b>A7</b>            | β-blocker with chronic stable angina                                                                                                                | <b>A8</b>            | -                                           |

|            |                                                                                                                                                                                                                                                                                                                                                 |                  |                                                      |
|------------|-------------------------------------------------------------------------------------------------------------------------------------------------------------------------------------------------------------------------------------------------------------------------------------------------------------------------------------------------|------------------|------------------------------------------------------|
| <b>A8</b>  | Salicylates in the presence of chronic atrial fibrillation (AF) where oral anticoagulants are contraindicated                                                                                                                                                                                                                                   | <b>A2</b>        | Salicylates instead of aspirin                       |
| <b>A9</b>  | Salicylates or clopidogrel with a documented history of atherosclerotic coronary, cerebral or peripheral vascular disease in patients with sinus rhythm.                                                                                                                                                                                        | <b>A3</b>        | -                                                    |
| <b>A10</b> | Oral anticoagulants in the presence of chronic atrial fibrillation                                                                                                                                                                                                                                                                              | <b>A1</b>        | -                                                    |
| <b>B1</b>  | Regular inhaled $\beta$ 2 agonist or anticholinergic agent for mild to moderate asthma or COPD                                                                                                                                                                                                                                                  | <b>B1</b>        | -                                                    |
| <b>B2</b>  | Regular inhaled corticosteroid for moderate-severe asthma or COPD (GOLD III-V, where predicted FEV1<50% and frequent exacerbations)                                                                                                                                                                                                             | <b>B2</b>        | Addition of GOLD III-V and frequent exacerbations    |
| <b>B3</b>  | Home continuous oxygen with chronic respiratory failure                                                                                                                                                                                                                                                                                         | <b>B3</b>        | -                                                    |
| <b>C1</b>  | Levodopa in idiopathic Parkinson's disease with definite functional impairment and resultant disability                                                                                                                                                                                                                                         | <b>C1</b>        | -                                                    |
| <b>C2</b>  | Antidepressant drug and depression (according to DSM IV and psychotherapy not effective or wanted)                                                                                                                                                                                                                                              | <b>C2</b>        | -                                                    |
| <b>D1</b>  | Proton pump inhibitor with severe gastro-oesophageal acid reflux disease or peptic stricture requiring dilation.                                                                                                                                                                                                                                | <b>D1</b>        | -                                                    |
| <b>D2</b>  | PPI with the use of a NSAID <u>and</u> <ul style="list-style-type: none"> <li>- History or complication of peptic ulcer disease</li> <li>- Age <math>\geq 70</math></li> <li>- Age 60 – 70 <i>and</i> use of one of the following: oral anticoagulants/oral corticosteroid/SSRI</li> </ul>                                                      | <b>STOPP E1</b>  | STOPP E1 and E5 are transferred into START criteria. |
| <b>D3</b>  | PPI with the use of a low dose of a salicylate <u>and</u> <ul style="list-style-type: none"> <li>- Age <math>\geq 60</math> <i>and</i> history of peptic ulcer disease</li> <li>- Age <math>\geq 70</math> <i>and</i> use of one of the following: oral anticoagulants/oral corticosteroids/SSRI</li> <li>- Age <math>\geq 80</math></li> </ul> | <b>STOPP A11</b> | Addition of age $\geq 70$                            |
| <b>D4</b>  | Fibre supplement for chronic, symptomatic diverticular                                                                                                                                                                                                                                                                                          | <b>D2</b>        | -                                                    |

|                            |                                                                                                        |                          |                                                                |
|----------------------------|--------------------------------------------------------------------------------------------------------|--------------------------|----------------------------------------------------------------|
| disease with constipation. |                                                                                                        |                          |                                                                |
| <b>E1</b>                  | Disease-modifying antirheumatic drug with active moderate-severe rheumatoid disease lasting > 4 weeks. | <b>E1</b>                | 4 weeks instead of 12 weeks                                    |
| <b>E2</b>                  | Bisphosphonates in patients taking maintenance corticosteroid therapy (> 3 months)                     | <b>E2</b>                | Addition of 3 months                                           |
| <b>E3</b>                  | Calcium and Vitamin D supplement in patients with (a high risk for) osteoporosis                       | <b>E3</b>                | Addition of 'a high risk for'.                                 |
| <b>F1</b>                  | Metformine with type II diabetes mellitus                                                              | <b>F1</b>                | -                                                              |
| <b>F2</b>                  | Antiplatelet therapy in diabetes mellitus with cardiovascular disease                                  | <b>F3</b>                | Cardiovascular disease instead of cardiovascular risk factors. |
| <b>F3</b>                  | Statin therapy in diabetes mellitus                                                                    | <b>F4</b>                | Exclusion of cardiovascular risk factors.                      |
| <b>G</b>                   | Laxatives with the use of opiates                                                                      | <b>STOPP I2</b>          | STOPP I2 is transferred into a START criterion                 |
| <b>TOTAL</b>               | <b>26 START criteria</b>                                                                               | <b>22 START criteria</b> |                                                                |
