# Supplementary material for: Specifying ICD9, ICPC and ATC codes for the STOPP/START criteria: a multidisciplinary consensus panel
Source: Oxford University Press journal article supplement (doi:10.1093/ageing/afu075), 2014-06-24
Supplement: afu075_supplementary_data.zip [file afu075_supplementary_data.zip › afu075supp_data2.pdf]

## Appendix 2 Specification of STOPP/START criteria

### STOPP criteria

|        |                                                                                                                    |        |                                                                                                                                                                                                                                         |                                                                                                                              | Considerations/solutions and other variables                                                                                                                                                                                                                                                                                                                                                                                                                                            |
|--------|--------------------------------------------------------------------------------------------------------------------|--------|-----------------------------------------------------------------------------------------------------------------------------------------------------------------------------------------------------------------------------------------|------------------------------------------------------------------------------------------------------------------------------|-----------------------------------------------------------------------------------------------------------------------------------------------------------------------------------------------------------------------------------------------------------------------------------------------------------------------------------------------------------------------------------------------------------------------------------------------------------------------------------------|
| A<br>1 | Digoxin > 0,125mg/day<br><br><b>C01AA05</b> = digoxin                                                              | and    | impaired renal function (GFR <50 ml/min)<br><br><b>ICPC U99.01</b> = impaired renal function<br><br><b>ICD9 585</b> = chronic kidney disease<br><b>ICD9 586</b> = renal failure, unspecified.<br><b>ICD9 584</b> = acute kidney failure |                                                                                                                              | <p>1) ICD9 584 = Acute kidney failure<br/>Can be reversible, therefore only included if recent episode (&lt;1 year) of acute kidney failure.</p> <p>2) Only include digoxin if dose &gt; 0,125 mg/day</p> <p>3) If the actual GFR is available use this information instead of the ICPC or ICD9 codes.</p> <div> <b>Variables</b><br/> (Episode of acute kidney failure) in the past year<br/> Digoxin dose &gt;0.125mg/day<br/> GFR &lt; 50 ml/min </div>                              |
| A<br>2 | Loop diuretic<br><br><b>C03CA</b> = sulfonamides plain<br><b>C03CB</b> = sulfonamides and potassium in combination | and    | ankle oedema<br><br><b>ICPC K07</b> = ankle oedema/swelling ankles<br><br><b>ICD9 459.81</b> = venous (peripheral) insufficiency                                                                                                        | without clinical signs of heart failure<br><br><b>ICPC K77</b> = decompensatio cordis<br><br><b>ICD9 428</b> = heart failure | <p>1) Ankle oedema has no ICD9 code. ICD9 782.3 = oedema but not particularly from the ankle, therefore excluded.</p> <p>2) Many clinical signs of heart failure. Only include decompensatio cordis/heart failure.</p> <p>3) ) The ICPC and ICD9 codes do not distinguish between systolic or diastolic heart failure. All heart failure is therefore included.</p>                                                                                                                     |
| A<br>3 | Loop diuretic<br><br><b>C03CA</b> = sulfonamides plain<br><b>C03CB</b> = sulfonamides and potassium in combination | as and | first line therapy for hypertension<br><br><b>ICPC K85</b> = hypertension<br><b>ICPC K86</b> = without organ failure<br><b>ICPC K87</b> = with organ failure                                                                            | without decompensatio cordis<br><br><b>ICPC K77</b> = decompensatio cordis<br><br><b>ICD9 428</b> = heart failure            | <p>1) To ensure the loop diuretics are given as a therapy for hypertension, decompensatio cordis must be absent.</p> <p>2) First-line therapy is defined by the absence of other anti-hypertensive drugs. Please see Appendix 3 'Specification of included medication codes' in the supplementary data on the journal website <a href="http://www.ageing.oxfordjournals.org/">http://www.ageing.oxfordjournals.org/</a> for a specification of all the included anti-hypertensives.</p> |

**ICD9 401** = essential  
hypertension  
**ICD9 405** =  
Secondary  
hypertension

or other anti-  
hypertensive drug

**C02AC01,**  
**C02LC01,**  
**C02LC51,**  
**C02AC05,**  
**C02LC05,**  
**C02AB,**  
**C02LB01,**  
**C02CA04,**  
**C02CA06,**  
**C02DB02,**  
**C02LG02,**  
**C02DB01,**  
**C02LG01,**  
**C02LG51,**  
**C02DC01,**  
**C02KD01,**  
**C02LN, C02N** =  
antihypertensives  
**C03A, C03B, C03D,**  
**C03E, C03X** =  
diuretics (excl loop  
diuretics)  
**C07** =  $\beta$ -blocking  
agents  
**C08** = calcium  
channel blockers  
**C09** = agents acting  
on the rennin-  
angiotensin system

|        |                                                                                                                                                                                                                                                                                                                                                         |     |                                                                                                                                                                                                                                                                                                                                |                                                                                                                                                                                                                                                                                                                                                                                               |  |  |  |
|--------|---------------------------------------------------------------------------------------------------------------------------------------------------------------------------------------------------------------------------------------------------------------------------------------------------------------------------------------------------------|-----|--------------------------------------------------------------------------------------------------------------------------------------------------------------------------------------------------------------------------------------------------------------------------------------------------------------------------------|-----------------------------------------------------------------------------------------------------------------------------------------------------------------------------------------------------------------------------------------------------------------------------------------------------------------------------------------------------------------------------------------------|--|--|--|
| A<br>4 | Thiazide diuretic                                                                                                                                                                                                                                                                                                                                       | and | history of gout                                                                                                                                                                                                                                                                                                                | 1) Included are those thiazide diuretic and combinations available in the Netherlands. Please see Appendix 3 'Specification of included medication codes' in the supplementary data on the journal website <a href="http://www.ageing.oxfordjournals.org/">http://www.ageing.oxfordjournals.org/</a> for a table with a specification of all the included thiazide diuretic and combinations. |  |  |  |
|        | <b>C03AA03=</b><br>hydrochlorothiazide<br><b>C03EA01, C09DA04,</b><br><b>C03EA01, C09DA06,</b><br><b>C07BB02, C09DA07,</b><br><b>C07BB07, C09DA08,</b><br><b>C09BA01, C09DX01,</b><br><b>C09BA02, C09DX03,</b><br><b>C09BA03, C09XA52,</b><br><b>C09BA05, C09BA09,</b><br><b>C09BA06, C09DA01</b><br><b>C09DA02, C09DA03 =</b><br>thiazide combinations |     | <b>ICPC T92 =</b> gout<br><br><b>ICD9 274 =</b> gout                                                                                                                                                                                                                                                                           |                                                                                                                                                                                                                                                                                                                                                                                               |  |  |  |
| A<br>5 | Non-cardio selective<br>β-blocker                                                                                                                                                                                                                                                                                                                       | and | COPD                                                                                                                                                                                                                                                                                                                           |                                                                                                                                                                                                                                                                                                                                                                                               |  |  |  |
|        | <b>C07AA =</b><br>β -blocking agents,<br>non-selective<br><b>C07AG01 =</b><br>labetalol<br><b>C07AG02 =</b><br>carvedilol<br><b>C07BA, C07CA, C07DA,</b><br><b>C07EA, C07FA =</b> non-<br>selective β - blocking<br>agents in combination<br>with other anti-<br>hypertensive drugs                                                                     |     | <b>ICPC R91 =</b><br>chronic bronchitis<br><b>ICPC R95 =</b><br>emphysema/COPD<br><br><b>ICD9 490 =</b><br>bronchitis, not<br>specified as acute or<br>chronic<br><b>ICD9 491 =</b><br>chronic bronchitis<br><b>ICD9 492 =</b><br>emphysema<br><b>ICD9 496 =</b><br>chronic airway<br>obstruction, not<br>elsewhere classified |                                                                                                                                                                                                                                                                                                                                                                                               |  |  |  |

|        |                                                                                                                                                           |     |                                                                                                                                                  |  |  |  |  |                                                                                                                                              |  |
|--------|-----------------------------------------------------------------------------------------------------------------------------------------------------------|-----|--------------------------------------------------------------------------------------------------------------------------------------------------|--|--|--|--|----------------------------------------------------------------------------------------------------------------------------------------------|--|
| A<br>6 | β-blocker                                                                                                                                                 | and | verapamil                                                                                                                                        |  |  |  |  |                                                                                                                                              |  |
|        | <b>C07</b> = β blocking agents                                                                                                                            |     | <b>C08DA01</b> = verapamil<br><b>C09BB10</b> = verapamil + tandolapril<br><b>C08DA51</b> = verapamil, combinations                               |  |  |  |  |                                                                                                                                              |  |
| A<br>7 | NYHA III-IV heart failure                                                                                                                                 | and | diltiazem or verapamil                                                                                                                           |  |  |  |  | 1) The ICPC and ICD9 codes do not define the stage of heart failure, decided is to included any stage of heart failure/decompensatio cordis. |  |
|        | <b>ICPC K77</b> = decompensatio cordis                                                                                                                    |     | <b>C08DB01</b> = diltiazem<br><b>C08DA01</b> = verapamil<br><b>C09BB10</b> = verapamil + tandolapril<br><b>C08DA51</b> = verapamil, combinations |  |  |  |  | <b>Variables</b><br>NYHA stage III-IV (heart failure)                                                                                        |  |
| A<br>8 | Calcium channel blockers                                                                                                                                  | and | chronic constipation                                                                                                                             |  |  |  |  |                                                                                                                                              |  |
|        | <b>C08</b> = Calcium channel blockers (CCB)<br><b>C08G</b> = CCB + diuretic<br><b>C09BB</b> = CCB + ACE inhibitor<br><b>C09DB</b> = CCB + AT2 antagonists |     | <b>ICPC D12</b> = constipation<br><b>ICD9 564.0</b> = constipation                                                                               |  |  |  |  |                                                                                                                                              |  |

|             |                                                                                                                                                                                                                                |         |                                                                                                                                                                                                                                                                                                                                                                                                                                                                         |  |  |                                                                                                                                                                                                                                                              |
|-------------|--------------------------------------------------------------------------------------------------------------------------------------------------------------------------------------------------------------------------------|---------|-------------------------------------------------------------------------------------------------------------------------------------------------------------------------------------------------------------------------------------------------------------------------------------------------------------------------------------------------------------------------------------------------------------------------------------------------------------------------|--|--|--------------------------------------------------------------------------------------------------------------------------------------------------------------------------------------------------------------------------------------------------------------|
| A<br>9      | Salicylates<br>(acetylsalicylic acid,<br>carbasalate calcium)                                                                                                                                                                  | and     | Dose > 160mg/day<br>(acetylsalicylic acid) or<br>dose > 200 mg/day<br>(carbasalate calcium)                                                                                                                                                                                                                                                                                                                                                                             |  |  | 1) Combination drugs (+ esomeprazole, dipyridamole, clopidogrel) excluded<br>because these combination drugs have a different maximum dose (mg/day)                                                                                                          |
|             | <b>B01AC06</b> =<br>acetylsalicylic acid<br><b>B01AC08</b> =<br>carbasalate calcium                                                                                                                                            |         |                                                                                                                                                                                                                                                                                                                                                                                                                                                                         |  |  | <b>Variables</b><br>Dose > 160 mg/day (acetylsalicylic acid)<br>Dose > 200 mg/day (carbasalate calcium)                                                                                                                                                      |
| A<br>1<br>0 | Salicylates<br>(acetylsalicylic acid,<br>carbasalate calcium)                                                                                                                                                                  | without | history of coronary<br>vascular,<br>cerebral vascular or<br>peripheral vascular<br>symptoms                                                                                                                                                                                                                                                                                                                                                                             |  |  | 1) Included are those conditions in which salicylates have an indication. For<br>example intracerebral hemorrhage (ICD9 431) is excluded.<br><br>2) Combination of acetylsalicylic acid with esomeprazole, clopidogrel and<br>dipyridamol are also included. |
|             | <b>B01AC06</b> =<br>acetylsalicylic acid<br><b>B01AC30</b> =<br>acetylsalicylic acid +<br>clopidogrel/<br>dipyridamol<br><b>B01AC56</b> =<br>acetylsalicylic acid +<br>esomeprazole<br><b>B01AC08</b> =<br>carbasalate calcium |         | <b>ICPC K74</b> =<br>angina pectoris<br><b>ICPC K75</b> =<br>acute myocardial<br>infarction<br><b>ICPC K76</b> =<br>ischemic heart<br>disease<br><b>ICPC K89</b> =<br>transient cerebral<br>ischemia<br><b>ICPC K90.03</b> =<br>cerebrovascular<br>disease<br><b>ICPC 92.01</b> =<br>intermittent<br>claudication<br><br><b>ICD9 410</b> =<br>acute myocardial<br>infarction<br><b>ICD 9 411</b> =<br>other acute and<br>subacute forms of<br>ischemic heart<br>disease |  |  |                                                                                                                                                                                                                                                              |

|             |                                                               |     |                                                                                                                                                                                                                                                                                                                                                                                                                                                                                                                                                                                                                                                                                                        |         |                            |                                     |  |
|-------------|---------------------------------------------------------------|-----|--------------------------------------------------------------------------------------------------------------------------------------------------------------------------------------------------------------------------------------------------------------------------------------------------------------------------------------------------------------------------------------------------------------------------------------------------------------------------------------------------------------------------------------------------------------------------------------------------------------------------------------------------------------------------------------------------------|---------|----------------------------|-------------------------------------|--|
|             |                                                               |     | <p><b>ICD 9 412</b> =<br/>old myocardial<br/>infarction</p> <p><b>ICD 9 413</b> =<br/>angina pectoris</p> <p><b>ICD 9 414</b> =<br/>other forms of<br/>chronic ischemic<br/>heart disease</p> <p><b>ICD9 433</b> =<br/>occlusion and<br/>stenosis of<br/>precerebral arteries</p> <p><b>ICD9 434</b> =<br/>occlusion of cerebral<br/>arteries</p> <p><b>ICD9 435</b> =<br/>transient cerebral<br/>ischemia</p> <p><b>ICD9 436</b> =<br/>acute, but ill-defined,<br/>cerebrovascular<br/>disease.</p> <p><b>ICD9 437</b> =<br/>other and ill-defined<br/>cerebrovascular<br/>disease.</p> <p><b>ICD9 444</b> =<br/>arterial embolism<br/>and thrombosis</p> <p><b>ICD9 445</b> =<br/>atheroembolism</p> |         |                            |                                     |  |
| A<br>1<br>1 | Salicylates<br>(acetylsalicylic acid,<br>carbasalate calcium) | and | dizziness not clearly<br>attributable to<br>cerebrovascular<br>disease                                                                                                                                                                                                                                                                                                                                                                                                                                                                                                                                                                                                                                 | without | cerebrovascular<br>disease | 1) Combination drugs also included. |  |



|     |                                                      |         |                                                          |  |  |  |  |
|-----|------------------------------------------------------|---------|----------------------------------------------------------|--|--|--|--|
|     |                                                      |         | extremity                                                |  |  |  |  |
| A14 | Oral anticoagulants during > 12 months               | for and | first, uncomplicated pulmonary embolism.                 |  |  |  |  |
|     | <b>B01AA =</b><br>vitamin K antagonists              |         | <b>ICPC K93 =</b><br>pulmonary embolism and infarction   |  |  |  |  |
|     |                                                      |         | <b>ICD9 415.1 =</b><br>pulmonary embolism and infarction |  |  |  |  |
|     |                                                      |         |                                                          |  |  |  |  |
| A15 | Platelet aggregation inhibitors/ oral anticoagulants | and     | concurrent bleeding disorder                             |  |  |  |  |
|     | <b>B01AC =</b><br>platelet aggregation inhibitors    |         | <b>ICPC B83.01 =</b><br>haemophilia                      |  |  |  |  |
|     | <b>B01AA =</b><br>vitamin K antagonists              |         | <b>ICD9 286 =</b><br>coagulation defects                 |  |  |  |  |

|        |                                                                                                                                                                                                                                                                                                                                                                                                                                                                                                                                                                                                                                                                                                                                                                                                                                                                                                                                                                                 |                                                                                                                                                                                                                                                                                     |
|--------|---------------------------------------------------------------------------------------------------------------------------------------------------------------------------------------------------------------------------------------------------------------------------------------------------------------------------------------------------------------------------------------------------------------------------------------------------------------------------------------------------------------------------------------------------------------------------------------------------------------------------------------------------------------------------------------------------------------------------------------------------------------------------------------------------------------------------------------------------------------------------------------------------------------------------------------------------------------------------------|-------------------------------------------------------------------------------------------------------------------------------------------------------------------------------------------------------------------------------------------------------------------------------------|
| B<br>1 | TCA and dementia                                                                                                                                                                                                                                                                                                                                                                                                                                                                                                                                                                                                                                                                                                                                                                                                                                                                                                                                                                | <p>1) Drug-induced persisting amnesic disorder (ICD 9 292.83) is excluded.</p> <p>2) Other cerebral degenerations (ICD 9 331) not complete group included. Exclusion of 331.3 (= communicating hydrocephalus), 331.4 (= obstructive hydrocephalus) and 331.81(=Reye's syndrome)</p> |
|        | <div data-bbox="210 302 443 505"> <p><b>N06AA</b> =<br/>non-selective<br/>monoamine reuptake<br/>inhibitors<br/><b>N06CA01</b> =<br/>amitriptyline +<br/>psycholeptics</p> </div> <div data-bbox="583 302 808 496"> <p><b>ICPC P70</b> =<br/>dementia/<br/>Alzheimers<br/><b>ICPC P20</b> =<br/>amnesic/<br/>concentration/<br/>orientation disorder</p> </div> <div data-bbox="583 521 808 1097"> <p><b>ICD9 290</b> =<br/>dementias<br/><b>ICD9 291.1</b> =<br/>alcohol induced<br/>persisting amnesic<br/>disorder<br/><b>ICD9 291.2</b> =<br/>alcohol induced<br/>persisting dementia<br/><b>ICD9 292.82</b> =<br/>drug induced<br/>persisting dementia<br/><b>ICD9 294.1</b> =<br/>dementia in<br/>conditions classified<br/>elsewhere<br/><b>ICD9 294.2</b> =<br/>dementia unspecified<br/><b>ICD9 331</b> =<br/>other cerebral<br/>degenerations</p> </div> <div data-bbox="583 1097 808 1180"> <p><b>Except</b><br/><b>331.3 + 331.4 +</b><br/><b>331.81</b></p> </div> |                                                                                                                                                                                                                                                                                     |



|        |                                                                                                                             |     |                                                                                                                                                                                                |  |  |                                                                                                              |
|--------|-----------------------------------------------------------------------------------------------------------------------------|-----|------------------------------------------------------------------------------------------------------------------------------------------------------------------------------------------------|--|--|--------------------------------------------------------------------------------------------------------------|
| B<br>5 | TCA                                                                                                                         | and | prostatism<br>or<br>prior history of urine<br>retention                                                                                                                                        |  |  | 1) Prostatism is defined as hyperplasia of the prostate or urine retention.                                  |
|        | <b>N06AA</b> =<br>non-selective<br>monoamine reuptake<br>inhibitors<br><b>N06CA01</b> =<br>amitriptyline +<br>psycholeptics |     | <b>ICPC Y85</b> =<br>benign prostatic<br>hypertrophy<br><b>U05.02</b> =<br>urine retention<br><br><b>ICD9 788.2</b> =<br>retention of urine<br><b>ICD9 600</b> =<br>hyperplasia of<br>prostate |  |  |                                                                                                              |
| B<br>6 | TCA                                                                                                                         | and | opiate or calcium<br>channel blocker                                                                                                                                                           |  |  | 1) Opioid anesthetics (N01AH) are excluded because they are only used during and shortly afterwards surgery. |
|        | <b>N06AA</b> =<br>non-selective<br>monoamine reuptake<br>inhibitors<br><b>N06CA01</b> =<br>amitriptyline +<br>psycholeptics |     | <b>N02A</b> =<br>opiods<br><b>C08</b> =<br>calcium channel<br>blocker<br><b>C08G</b> =<br>CCB + diuretic<br><b>C09BB</b> =<br>CCB + ACE inhibitor<br><b>C09DB</b> =<br>CCB + AT2-antagonist    |  |  |                                                                                                              |

|        |                                                                                                                                                                                                                                                                                         |     |                                                                                                                                                                                                                                  |  |  |                                                                                                                                                                                                                                                          |
|--------|-----------------------------------------------------------------------------------------------------------------------------------------------------------------------------------------------------------------------------------------------------------------------------------------|-----|----------------------------------------------------------------------------------------------------------------------------------------------------------------------------------------------------------------------------------|--|--|----------------------------------------------------------------------------------------------------------------------------------------------------------------------------------------------------------------------------------------------------------|
| B<br>7 | Long acting benzodiazepines during > 1 month                                                                                                                                                                                                                                            |     |                                                                                                                                                                                                                                  |  |  | 1) Definition long acting benzodiazepines, please see Appendix 3 'Specification of included medication codes' in the supplementary data on the journal website <a href="http://www.ageing.oxfordjournals.org/">http://www.ageing.oxfordjournals.org/</a> |
|        | <b>N05BA08</b> = bromazepam<br><b>N05BA02</b> = chlordiazepoxide<br><b>N05BA09</b> = clobazam<br><b>N05BA05</b> = clorazepate<br><b>N05BA01</b> = diazepam<br><b>N05CD01</b> = flurazepam<br><b>N05CD02</b> = nitrazepam<br><b>N05CD03</b> = flunitrazepam<br><b>N05BA11</b> = prazepam |     |                                                                                                                                                                                                                                  |  |  | <b>Variables</b><br>During > 1 month (use of long-acting benzodiazepines)                                                                                                                                                                                |
| B<br>8 | Neuroleptics (except clozapine or quetiapine)                                                                                                                                                                                                                                           | and | parkinsonism                                                                                                                                                                                                                     |  |  | 1) Lithium is also excluded.                                                                                                                                                                                                                             |
|        | <b>N05A</b> = antipsychotics<br><b>EXCEPT</b><br><b>N05AH02</b> = clozapine<br><b>N05AH04</b> = quetiapine<br><b>N05AN</b> = lithium                                                                                                                                                    |     | <b>ICPC N87</b> = parkinsonism/<br>Parkinson's disease<br><br><b>ICD9 332</b> = Parkinson's disease/<br>secondary Parkinson's<br><b>ICD9 331.6</b> = corticobasal degeneration<br><b>ICD9 331.82</b> = dementia with lewy bodies |  |  |                                                                                                                                                                                                                                                          |

[illegible]

|             |                                                                                                                                                                                                                                                                                                                     |     |                                                                                                                                      |                                                                                                                                                                                                                                                        |  |  |  |  |
|-------------|---------------------------------------------------------------------------------------------------------------------------------------------------------------------------------------------------------------------------------------------------------------------------------------------------------------------|-----|--------------------------------------------------------------------------------------------------------------------------------------|--------------------------------------------------------------------------------------------------------------------------------------------------------------------------------------------------------------------------------------------------------|--|--|--|--|
| B<br>1<br>3 | Classic antihistamines<br>during > 1 week                                                                                                                                                                                                                                                                           |     |                                                                                                                                      | 1) Classic antihistamines specification, please see Appendix 3 'Specification of included medication codes' in the supplementary data on the journal website <a href="http://www.ageing.oxfordjournals.org/">http://www.ageing.oxfordjournals.org/</a> |  |  |  |  |
|             | <div>R06AA02,R06AA52<br/>R06AA04,R06AA54<br/>R06AB02,R06AB52<br/>R06AB03,R06AB04<br/>R06AB54,R06AC04<br/>R06AD01,R06AD02<br/>R06AD52,R06AD08<br/>R06AE03,R06AE53<br/>R06AE04,R06AE05<br/>R06AE05,R06AE06<br/>R06AX02,R06AX15<br/>R06AX17 N05BB01<br/>N05BB51,N07CA02<br/>N07CA52 =<br/>classic antihistamines</div> |     |                                                                                                                                      | <div>Variables</div> <div>During &gt; 1 week (use of classic antihistamines)</div>                                                                                                                                                                     |  |  |  |  |
| C<br>1      | Loperamide<br>or<br>codeine                                                                                                                                                                                                                                                                                         | and | diarrhea of unknown<br>cause                                                                                                         |                                                                                                                                                                                                                                                        |  |  |  |  |
|             | <div>A07DA03 =<br/>loperamide<br/>A07DA05 =<br/>loperamide oxide<br/>A07DA53 =<br/>loperamide,<br/>combinations<br/>R05DA04 =<br/>codeine<br/>N02AA59 =<br/>codeine, combinations<br/>excl. psycholeptics<br/>N02AA79 =<br/>codeine, combinations<br/>with psycholeptics</div>                                      |     | <div>ICPC D11 =<br/>diarrhea<br/>ICPC D73 =<br/>assumed gastro-<br/>intestinal infection</div> <div>ICD9 787.91 =<br/>diarrhea</div> |                                                                                                                                                                                                                                                        |  |  |  |  |

|        |                                                                                                                                                                                                                                                                                                                                               |     |                                                                                                                               |                                                                                                      |  |  |  |  |
|--------|-----------------------------------------------------------------------------------------------------------------------------------------------------------------------------------------------------------------------------------------------------------------------------------------------------------------------------------------------|-----|-------------------------------------------------------------------------------------------------------------------------------|------------------------------------------------------------------------------------------------------|--|--|--|--|
| C<br>2 | Loperamide<br>or<br>codeine                                                                                                                                                                                                                                                                                                                   | and | severe infective<br>gastroenteritis                                                                                           | 1) Including all intestinal infectious diseases ICD9 001-009 (e.g. cholera, typhoid, salmonella etc) |  |  |  |  |
|        | <b>A07DA03</b> =<br>loperamide<br><b>A07DA05</b> =<br>Loperamide oxide<br><b>A07DA53</b> =<br>loperamide,<br>combinations<br><b>R05DA04</b> =<br>codeine<br><b>N02AA59</b> =<br>codeine, combinations<br>excl. psycholeptics<br><b>N02AA79</b> =<br>codeine, combinations<br>with psycholeptics                                               |     | <b>ICPC D70</b> =<br>Infectious diarrhoea/<br>dysenteriae<br><br><b>ICD9 001 – 009</b> =<br>intestinal infectious<br>diseases |                                                                                                      |  |  |  |  |
| C<br>3 | Parkinsonism                                                                                                                                                                                                                                                                                                                                  | and | metoclopramide                                                                                                                |                                                                                                      |  |  |  |  |
|        | <b>ICPC N87</b> =<br>parkinsonism/<br>Parkinson's disease<br><br><b>ICD9 332</b> =<br>Parkinson's disease/<br>secondary Parkinson's<br><b>ICD9 331.6</b> =<br>corticobasal<br>degeneration<br><b>ICD9 331.82</b> =<br>dementia with lewy<br>bodies<br><b>ICD9 333.0</b> =<br>other degenerative<br>diseases of the basal<br>ganglia (PSP/MSA) |     | <b>A03FA01</b> =<br>metoclopramide                                                                                            |                                                                                                      |  |  |  |  |

[illegible]

|        |                                                                                                                                                                                                                                                                                                                                                     |                       |                                                                                                                                                                                                                                                                 |               |                                                                                                                                                               |                                                                                                                                                                                                                                                            |
|--------|-----------------------------------------------------------------------------------------------------------------------------------------------------------------------------------------------------------------------------------------------------------------------------------------------------------------------------------------------------|-----------------------|-----------------------------------------------------------------------------------------------------------------------------------------------------------------------------------------------------------------------------------------------------------------|---------------|---------------------------------------------------------------------------------------------------------------------------------------------------------------|------------------------------------------------------------------------------------------------------------------------------------------------------------------------------------------------------------------------------------------------------------|
| D<br>1 | COPD                                                                                                                                                                                                                                                                                                                                                | and                   | theophylline                                                                                                                                                                                                                                                    | as<br>without | monotherapy:                                                                                                                                                  | 1) Monotherapy is defined by the absence of :<br>anticholinergics inhalants, glucocorticoids inhalants and adrenergics inhalants.                                                                                                                          |
|        | <p><b>ICPC R91</b> =<br/>chronic bronchitis<br/><b>ICPC R95</b> =<br/>emphysema/COPD</p> <p><b>ICD9 490</b> =<br/>bronchitis, not<br/>specified as acute or<br/>chronic<br/><b>ICD9 491</b> =<br/>chronic bronchitis<br/><b>ICD9 492</b> =<br/>emphysema<br/><b>ICD9 496</b> =<br/>chronic airway<br/>obstruction, not<br/>elsewhere classified</p> |                       | <p><b>R03DA04</b> =<br/>theophylline<br/><b>R03DB04</b> =<br/>theophylline +<br/>adrenergics<br/><b>R03DA54</b> =<br/>theophylline,<br/>combinations excl.<br/>psycholeptics<br/><b>R03DA74</b> =<br/>theophylline,<br/>combinations with<br/>psycholeptics</p> |               | <p><b>R03A</b> =<br/>adrenergics<br/>inhalants<br/><b>R03BA</b> =<br/>Glucocorticoids<br/>inhalants<br/><b>R03BB</b> =<br/>Anticholinergics<br/>inhalants</p> |                                                                                                                                                                                                                                                            |
| D<br>2 | Systemic corticosteroids                                                                                                                                                                                                                                                                                                                            | instead of<br>without | inhaled corticosteroids                                                                                                                                                                                                                                         | for<br>and    | maintenance<br>therapy in<br>moderate-severe<br>COPD                                                                                                          | 1) Systemic corticosteroids which can be indicated for COPD and those<br>available in the Netherlands are included. Not complete group H02AB included<br>because not all indicated for COPD. For example Cortisone (H02AB10) is not<br>indicated for COPD. |
|        |                                                                                                                                                                                                                                                                                                                                                     |                       | <p><b>R03BA</b> =<br/>glucocorticoids<br/>inhalants</p>                                                                                                                                                                                                         |               | <p><b>ICPC R91</b> =<br/>chronic bronchitis<br/><b>ICPC R95</b> =<br/>emphysema/COPD</p>                                                                      |                                                                                                                                                                                                                                                            |

|        |                                                                                                                                                                                                                                                                                                                               |     |                                                                                                                                                                                                                                             |                                                                                                                                                                                                                                                                                 |
|--------|-------------------------------------------------------------------------------------------------------------------------------------------------------------------------------------------------------------------------------------------------------------------------------------------------------------------------------|-----|---------------------------------------------------------------------------------------------------------------------------------------------------------------------------------------------------------------------------------------------|---------------------------------------------------------------------------------------------------------------------------------------------------------------------------------------------------------------------------------------------------------------------------------|
|        | <b>H02AB01</b> =<br>betamethasone<br><b>H02AB02</b> =<br>dexamethasone<br><b>H02AB04</b> =<br>methyl-prednisolone<br><b>H02AB06</b> =<br>prednisolone<br><b>H02AB07</b> =<br>prednisone<br><b>H02AB08</b> =<br>triamcinolone<br><b>H02AB09</b> =<br>hydrocortisone<br><b>H02BX01</b> =<br>methyl-prednisolone<br>combinations |     | <b>ICD9 490</b> =<br>bronchitis, not<br>specified as acute<br>or chronic<br><b>ICD9 491</b> =<br>chronic bronchitis<br><b>ICD9 492</b> =<br>emphysema<br><b>ICD9 496</b> =<br>chronic airway<br>obstruction, not<br>elsewhere<br>classified |                                                                                                                                                                                                                                                                                 |
| D<br>3 | Glaucoma                                                                                                                                                                                                                                                                                                                      | and | ipratropium or<br>tiotropium                                                                                                                                                                                                                |                                                                                                                                                                                                                                                                                 |
|        | <b>ICPC F93</b> = glaucoma<br><br><b>ICD9 365</b> = glaucoma                                                                                                                                                                                                                                                                  |     | <b>R03BB01</b> =<br>ipratropium<br><b>R03BB04</b> =<br>tiotropium<br><b>R03AK03</b> =<br>fenoterol /<br>ipratropium<br><b>R03AK04</b> =<br>salbutamol /<br>ipratropium                                                                      |                                                                                                                                                                                                                                                                                 |
| E<br>1 | NSAID                                                                                                                                                                                                                                                                                                                         | and | moderate-severe<br>hypertension                                                                                                                                                                                                             | 1) Please see Appendix 3 'Specification of included medication codes' in the<br>supplementary data on the journal website<br><a href="http://www.ageing.oxfordjournals.org/">http://www.ageing.oxfordjournals.org/</a> for a table with a specification of<br>included NSAID's. |
|        | <b>M01AA, M01AB,</b><br><b>M01AC, M01AE,</b><br><b>M01AG, M01AH,</b><br><b>M01AX01</b> =<br>NSAID's                                                                                                                                                                                                                           |     | <b>ICPC K85</b> =<br>hypertension<br><b>ICPC K86</b> =<br>without organ failure<br><b>ICPC K87</b> =<br>with organ failure                                                                                                                  |                                                                                                                                                                                                                                                                                 |

|        |                                                                                                                                                     |            |                                                                                                                                                                  |                                                                     |  |  |  |  |
|--------|-----------------------------------------------------------------------------------------------------------------------------------------------------|------------|------------------------------------------------------------------------------------------------------------------------------------------------------------------|---------------------------------------------------------------------|--|--|--|--|
| E<br>2 | <div>N02BA =<br/>salicylic acid and<br/>derivates (analgesic)</div>                                                                                 |            | <div>ICD9 401 =<br/>essential<br/>hypertension<br/>ICD9 405 = secondary<br/>hypertension</div>                                                                   |                                                                     |  |  |  |  |
|        | NSAID                                                                                                                                               | and        | heartfailure                                                                                                                                                     |                                                                     |  |  |  |  |
|        | <div>M01AA, M01AB,<br/>M01AC, M01AE,<br/>M01AG, M01AH,<br/>M01AX01 =<br/>NSAID's<br/>N02BA =<br/>salicylic acid and<br/>derivates (analgesic)</div> |            | <div>ICPC K77 =<br/>decompensatio<br/>cordis</div>                                                                                                               |                                                                     |  |  |  |  |
|        |                                                                                                                                                     |            | <div>ICD9 428 =<br/>heart failure</div>                                                                                                                          |                                                                     |  |  |  |  |
| E<br>3 | NSAID                                                                                                                                               | and        | chronic renal failure                                                                                                                                            |                                                                     |  |  |  |  |
|        | <div>M01AA, M01AB,<br/>M01AC, M01AE,<br/>M01AG, M01AH,<br/>M01AX01 =<br/>NSAID's<br/>N02BA =<br/>salicylic acid and<br/>derivates (analgesic)</div> |            | <div>ICPC U99.01 =<br/>impaired renal<br/>function</div> <div>ICD9 585 =<br/>chronic kidney<br/>disease<br/>ICD9 586 =<br/>renal failure,<br/>unspecified.</div> |                                                                     |  |  |  |  |
| E<br>4 | NSAID during > 3months                                                                                                                              | for<br>and | symptom relief of mild<br>osteoarthritis                                                                                                                         |                                                                     |  |  |  |  |
|        | <div>M01AA, M01AB,<br/>M01AC, M01AE,<br/>M01AG, M01AH,<br/>M01AX01 =<br/>NSAID's<br/>N02BA =<br/>salicylic acid and<br/>derivates (analgesic)</div> |            | <div>ICPC L84.01 =<br/>artrosis spine<br/>ICPC L89 =<br/>coxartrosis<br/>ICPC L90 =<br/>gonartrosis<br/>ICPC L91 =<br/>other artrosis</div>                      | <div>Variables</div> <div>During &gt; 3 months (use of NSAID)</div> |  |  |  |  |

|             |                                                                                                                                                                                                                                                                                                                               |                       |                                                                                                                                                                                                                      |                       |                                                                                                                                                                                                                 |                                                                                                                                                                                                                                                                                                                                                                            |
|-------------|-------------------------------------------------------------------------------------------------------------------------------------------------------------------------------------------------------------------------------------------------------------------------------------------------------------------------------|-----------------------|----------------------------------------------------------------------------------------------------------------------------------------------------------------------------------------------------------------------|-----------------------|-----------------------------------------------------------------------------------------------------------------------------------------------------------------------------------------------------------------|----------------------------------------------------------------------------------------------------------------------------------------------------------------------------------------------------------------------------------------------------------------------------------------------------------------------------------------------------------------------------|
|             |                                                                                                                                                                                                                                                                                                                               |                       |                                                                                                                                                                                                                      |                       | <b>ICD9 715 =</b><br>osteoarthritis and<br>allied disorders                                                                                                                                                     |                                                                                                                                                                                                                                                                                                                                                                            |
| E<br>5      | NSAID during > 3<br>months                                                                                                                                                                                                                                                                                                    | <del>for</del><br>and | gout                                                                                                                                                                                                                 | without               | contraindication for<br>allopurinol or proven<br>ineffectiveness.                                                                                                                                               | 1) No ATC code available for contra-indication for allopurinol. Solution: if patient's contra-indications are available use this information, if not available use <i>without</i> allopurinol. Although the latter gives the possibility of false positive alerts.                                                                                                         |
|             | <b>M01AA, M01AB,<br/>M01AC, M01AE,<br/>M01AG, M01AH,<br/>M01AX01 =</b><br>NSAID's                                                                                                                                                                                                                                             |                       | <b>ICPC T92 =</b> gout                                                                                                                                                                                               |                       | <b>M04AA01 =</b><br>allopurinol<br><b>M04AA51 =</b><br>allopurinol<br>combinations.                                                                                                                             | <b>Variables</b>                                                                                                                                                                                                                                                                                                                                                           |
|             | <b>N02BA =</b><br>salicylic acid and<br>derivates (analgesic)                                                                                                                                                                                                                                                                 |                       | <b>ICD9274 =</b> gout                                                                                                                                                                                                |                       |                                                                                                                                                                                                                 | During > 3 months (use of NSAID)<br>Contra-indication allopurinol                                                                                                                                                                                                                                                                                                          |
| E<br>6<br>a | Corticosteroids during ><br>3 months                                                                                                                                                                                                                                                                                          | as<br>without         | monotherapy                                                                                                                                                                                                          | <del>for</del><br>and | rheumatoid arthritis                                                                                                                                                                                            | 1) Monotherapy is defined by the absence of DMARDs (disease modifying antirheumatic drugs), biological's or NSAIDs which can be indicated for RA.                                                                                                                                                                                                                          |
|             | <b>H02AB01 =</b><br>betamethasone<br><b>H02AB02 =</b><br>dexamethasone<br><b>H02AB04 =</b><br>methyl-prednisolone<br><b>H02AB06 =</b><br>prednisolone<br><b>H02AB07 =</b><br>prednisone<br><b>H02AB08 =</b><br>triamcinolone<br><b>H02AB09 =</b><br>hydrocortisone<br><b>H02BX01 =</b><br>methyl-prednisolone<br>combinations |                       | <b>L04AX01 =</b><br>azathioprine<br><b>L04AX03 =</b><br>methotrexate<br><b>L04AA13 =</b><br>leflunomide<br><b>L04AD01 =</b><br>Ciclosporin<br><b>A07EC01 =</b><br>sulfasalazine<br><b>P01BA =</b><br>aminoquinolines |                       | <b>ICPC L88.01 =</b><br>Rheumatoid<br>arthritis<br><br><b>ICD9 714.0 =</b><br>rheumatoid<br>arthritis<br><b>ICD9 7 14.2 =</b><br>other rheumatoid<br>arthritis with<br>visceral or<br>systematic<br>involvement | 2) Corticosteroids which can be indicated for rheumatoid arthritis and those available in the Netherlands are included. Not complete group H02AB included because not all indicated for RA. For example Cortisone (H02AB10) is not indicated for RA.<br><br>3) STOPP criterion E6 is subdivided in criterion E6a (rheumatoid arthritis part) and E6b (osteoarthritis part) |
|             |                                                                                                                                                                                                                                                                                                                               |                       |                                                                                                                                                                                                                      |                       |                                                                                                                                                                                                                 | <b>Variables</b>                                                                                                                                                                                                                                                                                                                                                           |
|             |                                                                                                                                                                                                                                                                                                                               |                       |                                                                                                                                                                                                                      |                       |                                                                                                                                                                                                                 | During > 3 months (use of corticosteroids)                                                                                                                                                                                                                                                                                                                                 |

[illegible]

|                                                                                                                                                                                                                                                                                                                                                             |                                |            |                                                     |                                                                                     |                                                                                                                                                                                                                                                                    |
|-------------------------------------------------------------------------------------------------------------------------------------------------------------------------------------------------------------------------------------------------------------------------------------------------------------------------------------------------------------|--------------------------------|------------|-----------------------------------------------------|-------------------------------------------------------------------------------------|--------------------------------------------------------------------------------------------------------------------------------------------------------------------------------------------------------------------------------------------------------------------|
| <div> <b>H02AB01</b> =<br/>betamethasone<br/> <b>H02AB02</b> =<br/>dexamethasone<br/> <b>H02AB04</b> =<br/>methylprednisolone<br/> <b>H02AB06</b> =<br/>prednisolone<br/> <b>H02AB07</b> = prednisone<br/> <b>H02AB08</b> =<br/>triamcinolone<br/> <b>H02AB09</b> =<br/>hydrocortisone<br/> <b>H02BX01</b> =<br/>methylprednisolone<br/>combinations </div> |                                |            |                                                     |                                                                                     |                                                                                                                                                                                                                                                                    |
| E<br>7                                                                                                                                                                                                                                                                                                                                                      | Colchicine<br>during > 3months | for<br>and | gout                                                | without<br>contraindication for<br>allopurinol or proven<br>ineffectiveness.        | 1) No ATC code available for contra-indication for allopurinol. Solution: if patient's contra-indications are available use this information, if not available use <i>without</i> allopurinol. Although the latter gives the possibility of false positive alerts. |
|                                                                                                                                                                                                                                                                                                                                                             | <b>M04AC01</b> =<br>colchicine |            | <b>ICPC T92</b> = gout<br><br><b>ICD9274</b> = gout | <b>M04AA01</b> =<br>allopurinol<br><b>M04AA51</b> =<br>allopurinol<br>combinations. | <b>Variables</b><br>During > 3 months (use of colchicine)<br>Contra-indication allopurinol                                                                                                                                                                         |

|        |                                                                                                                                                                              |     |                                                                                                                                                                                                                                                                                                                                                                                                                               |                                                                                                                                                                                                                                                                                         |  |
|--------|------------------------------------------------------------------------------------------------------------------------------------------------------------------------------|-----|-------------------------------------------------------------------------------------------------------------------------------------------------------------------------------------------------------------------------------------------------------------------------------------------------------------------------------------------------------------------------------------------------------------------------------|-----------------------------------------------------------------------------------------------------------------------------------------------------------------------------------------------------------------------------------------------------------------------------------------|--|
| F<br>1 | Urogenital<br>anticholinergic drugs                                                                                                                                          | and | dementia                                                                                                                                                                                                                                                                                                                                                                                                                      | <p>1) Drug-induced persisting amnesic disorder (ICD 9 292.83) is excluded.</p> <p>2) Other cerebral degenerations (ICD 9 331) not complete group included.<br/>Exclusion of 331.3 (= communicating hydrocephalus), 331.4 (= obstructive hydrocephalus) and 331.81(=Reye's syndrome)</p> |  |
|        | <b>G04BD04</b> =<br>oxybutynine<br><b>G04BD07</b> =<br>tolterodine<br><b>G04BD08</b> =<br>solifenacin<br><b>G04BD10</b> =<br>darifenacin<br><b>G04BD11</b> =<br>fesoterodine |     | <b>ICPC P70</b> =<br>dementia/<br>Alzheimers<br><b>ICPC P20</b> =<br>amnesic/<br>concentration/<br>orientation disorder                                                                                                                                                                                                                                                                                                       |                                                                                                                                                                                                                                                                                         |  |
|        |                                                                                                                                                                              |     | <b>ICD9 290</b> =<br>dementias<br><b>ICD9 291.1</b> =<br>alcohol induced<br>persisting amnesic<br>disorder<br><b>ICD9 291.2</b> =<br>alcohol induced<br>persisting dementia<br><b>ICD9 292.82</b> =<br>drug induced<br>persisting dementia<br><b>ICD9 294.1</b> =<br>dementia in<br>conditions classified<br>elsewhere<br><b>ICD9 294.2</b> =<br>dementia unspecified<br><b>ICD9 331</b> =<br>other cerebral<br>degenerations |                                                                                                                                                                                                                                                                                         |  |
|        |                                                                                                                                                                              |     | <b>Except</b><br><b>331.3 + 331.4 +</b><br><b>331.81</b>                                                                                                                                                                                                                                                                                                                                                                      |                                                                                                                                                                                                                                                                                         |  |

|        |                                                                                                                            |     |                                                                                                                                                  |
|--------|----------------------------------------------------------------------------------------------------------------------------|-----|--------------------------------------------------------------------------------------------------------------------------------------------------|
| F<br>2 | Urogenital anticholinergic drugs                                                                                           | and | chronic glaucoma                                                                                                                                 |
|        | G04BD04 = oxybutynine<br>G04BD07 = tolterodine<br>G04BD08 = solifenacin<br>G04BD10 = darifenacin<br>G04BD11 = fesoterodine |     | ICPC F93 = glaucoma<br><br>ICD9 365 = glaucoma                                                                                                   |
| F<br>3 | Urogenital anticholinergic drugs                                                                                           | and | chronic constipation                                                                                                                             |
|        | G04BD04 = oxybutynine<br>G04BD07 = tolterodine<br>G04BD08 = solifenacin<br>G04BD10 = darifenacin<br>G04BD11 = fesoterodine |     | ICPC D12 = constipation<br><br>IDC9 564.0 = constipation                                                                                         |
| F<br>4 | Urogenital anticholinergic drugs                                                                                           | and | chronic prostatism                                                                                                                               |
|        | G04BD04 = oxybutynine<br>G04BD07 = tolterodine<br>G04BD08 = solifenacin<br>G04BD10 = darifenacin<br>G04BD11 = fesoterodine |     | ICPC Y85 = benign prostatic hypertrophy<br>U05.02 = urine retention<br><br>ICD9 788.2 = retention of urine<br>ICD9 600 = hyperplasia of prostate |

|        |                                                         |     |                                          |  |  |                                                                                                                                                                                                                                                                                       |
|--------|---------------------------------------------------------|-----|------------------------------------------|--|--|---------------------------------------------------------------------------------------------------------------------------------------------------------------------------------------------------------------------------------------------------------------------------------------|
| F<br>5 | Males and one or more episodes of incontinence daily    | and | $\alpha$ -1 blockers                     |  |  | 1) Including all $\alpha$ -1 blockers (indication BPH and hypertension) Please see Appendix 3 'Specification of included medication codes' in the supplementary data on the journal website <a href="http://www.ageing.oxfordjournals.org/">http://www.ageing.oxfordjournals.org/</a> |
|        | ICPC U04 = urinary incontinence                         |     | G04CA = alpha-adrenoreceptor antagonists |  |  | Variables                                                                                                                                                                                                                                                                             |
|        | ICD9 788.3 = urinary incontinence                       |     | C02CA04 = doxazosin                      |  |  | males                                                                                                                                                                                                                                                                                 |
|        |                                                         |     | C02CA06 = urapidil                       |  |  |                                                                                                                                                                                                                                                                                       |
|        |                                                         |     | C02KD01 = ketanserine                    |  |  |                                                                                                                                                                                                                                                                                       |
| F<br>6 | Urinary catheter in situ during > 2 months              | and | $\alpha$ -blockers                       |  |  | 1) Including only the $\alpha$ -blockers given for urinary problems. No need to stop the $\alpha$ -blockers given for hypertension.                                                                                                                                                   |
|        | ICD9 V53.6 = fitting and adjustment of urinary devices. |     | G04CA = alpha-adrenoreceptor antagonists |  |  | 2) ICD9 V53.6 = fitting and adjustment of urinary devices. No other ICD9 or ICPC code available for urinary catheter. V53.6 is included.                                                                                                                                              |
|        |                                                         |     |                                          |  |  | Variables                                                                                                                                                                                                                                                                             |
|        |                                                         |     |                                          |  |  | During > 2 months (urinary catheter in situ)                                                                                                                                                                                                                                          |
|        |                                                         |     |                                          |  |  | Urinary catheter in situ                                                                                                                                                                                                                                                              |
| G<br>1 | Diabetes mellitus type 2                                | and | glibenclamide                            |  |  |                                                                                                                                                                                                                                                                                       |
|        | ICPC T90.02 = diabetes mellitus type 2                  |     | A01BB01 = glibenclamide                  |  |  |                                                                                                                                                                                                                                                                                       |
|        | ICD9                                                    |     |                                          |  |  |                                                                                                                                                                                                                                                                                       |
|        | 250.00, 250.02                                          |     |                                          |  |  |                                                                                                                                                                                                                                                                                       |
|        | 250.10, 250.12                                          |     |                                          |  |  |                                                                                                                                                                                                                                                                                       |
|        | 250.20, 250.22                                          |     |                                          |  |  |                                                                                                                                                                                                                                                                                       |
|        | 250.30, 250.32                                          |     |                                          |  |  |                                                                                                                                                                                                                                                                                       |
|        | 250.40, 250.42                                          |     |                                          |  |  |                                                                                                                                                                                                                                                                                       |
|        | 250.50, 250.52                                          |     |                                          |  |  |                                                                                                                                                                                                                                                                                       |
|        | 250.60, 250.62                                          |     |                                          |  |  |                                                                                                                                                                                                                                                                                       |
|        | 250.70, 250.72                                          |     |                                          |  |  |                                                                                                                                                                                                                                                                                       |
|        | 250.80, 250.82                                          |     |                                          |  |  |                                                                                                                                                                                                                                                                                       |
|        | 250.90, 250.92                                          |     |                                          |  |  |                                                                                                                                                                                                                                                                                       |
|        | = DM type 2                                             |     |                                          |  |  |                                                                                                                                                                                                                                                                                       |

|        |                                                                                                                                                                                                                                                                        |     |                                                                                                                    |     |                                                                                                                                                                                               |                                                                                                                                                                                                                                                                    |
|--------|------------------------------------------------------------------------------------------------------------------------------------------------------------------------------------------------------------------------------------------------------------------------|-----|--------------------------------------------------------------------------------------------------------------------|-----|-----------------------------------------------------------------------------------------------------------------------------------------------------------------------------------------------|--------------------------------------------------------------------------------------------------------------------------------------------------------------------------------------------------------------------------------------------------------------------|
| G<br>2 | Non-selective $\beta$ -blocker                                                                                                                                                                                                                                         | and | diabetes mellitus                                                                                                  | and | 1 or more hypoglycemic episodes per month                                                                                                                                                     | <div>Variables</div> <div>1 or more (hypoglycemic episodes) per month</div>                                                                                                                                                                                        |
|        | <b>C07AA</b> =<br>$\beta$ -blocking agents, non-selective<br><b>C07AG01</b> =<br>labetalol<br><b>C07AG02</b> =<br>carvedilol<br><b>C07BA, C07CA, C07DA, C07EA, C07FA</b> =<br>non-selective $\beta$ -blocking agents in combination with other anti-hypertensive drugs |     | <b>ICPC T90</b> =<br>diabetes mellitus (type 1 + 2)<br><br><b>ICD9 250</b> =<br>diabetes mellitus (type 1 + 2)     |     | <b>ICPC T87</b> =<br>hypoglycemia<br><br><b>ICD9 251.0</b> =<br>hypoglycemic coma<br><b>ICD9 252.1</b> =<br>other specified hypoglycemia<br><b>ICD9 251.2</b> =<br>hypoglycemia, unspecified. |                                                                                                                                                                                                                                                                    |
| G<br>3 | Oestrogens                                                                                                                                                                                                                                                             | and | breast cancer                                                                                                      |     |                                                                                                                                                                                               | 1) Please see Appendix 3 'Specification of included medication codes' in the supplementary data on the journal website<br><a href="http://www.ageing.oxfordjournals.org/">http://www.ageing.oxfordjournals.org/</a> for a specification of the included oestrogens |
|        | <b>G03AA, G03AB, G03C, G03EA, G03EB, G03F, G03HB, L02AA</b> =<br>estrogens (and combinations)                                                                                                                                                                          |     | <b>ICPC X76</b> = malignant neoplasm of female breast<br><br><b>ICD9 174</b> = Malignant neoplasm of female breast |     |                                                                                                                                                                                               |                                                                                                                                                                                                                                                                    |

|        |                                                                                                              |         |                                                                                                                                                                                                                                                                                                                                                                                                                                  |     |               |                                                                                                                                                                                                                                                                                                                                                                                                                          |
|--------|--------------------------------------------------------------------------------------------------------------|---------|----------------------------------------------------------------------------------------------------------------------------------------------------------------------------------------------------------------------------------------------------------------------------------------------------------------------------------------------------------------------------------------------------------------------------------|-----|---------------|--------------------------------------------------------------------------------------------------------------------------------------------------------------------------------------------------------------------------------------------------------------------------------------------------------------------------------------------------------------------------------------------------------------------------|
| G<br>4 | Oestrogens                                                                                                   | and     | venous thromboembolism                                                                                                                                                                                                                                                                                                                                                                                                           |     |               | <p>1) Notice the difference of included estrogens between criterion G3 and G4. Please see Appendix 3 'Specification of included medication codes' in the supplementary data on the journal website <a href="http://www.ageing.oxfordjournals.org/">http://www.ageing.oxfordjournals.org/</a></p>                                                                                                                         |
|        | <b>G03AA, G03AB, G03C, G03EA, G03EB, G03F, G03HB, G03XC01, G03XC02, L02AA</b> = estrogens (and combinations) |         | <b>ICPC K94.01</b> = DVT<br><b>ICD9 453.4</b> = DVT of lower extremity<br><b>ICD9 453.82</b> = DVT of upper extremity<br><b>ICD9 453</b> = Other venous embolism and thrombosis<br><br><b>ICPC K93</b> = pulmonary embolism or infarction<br><b>ICD9 415.1</b> = pulmonary embolism or infarction<br><b>ICD9 452</b> = portal vein thrombosis<br><b>ICD9 325</b> = phlebitis and thrombophlebitis of intracranial venous sinuses |     |               |                                                                                                                                                                                                                                                                                                                                                                                                                          |
| G<br>5 | Oestrogens                                                                                                   | without | progestogens                                                                                                                                                                                                                                                                                                                                                                                                                     | and | intact uterus | <p>1) Please see Appendix 3 'Specification of included medication codes' in the supplementary data on the journal website <a href="http://www.ageing.oxfordjournals.org/">http://www.ageing.oxfordjournals.org/</a> for a specification of included progestogens.</p> <p>2) No ICD9 or ICPC code for intact uterus or hysterectomy. Solution: excluding intact uterus, although this can give false positive alerts.</p> |
|        | <b>G03AA, G03AB, G03C, G03EA, G03EB, G03F, G03HB, G03XC01, G03XC02, L02AA</b> = estrogens (and combinations) |         | <b>G03A, G03D, G03EB, G03F, G02BA03, G02BB01, L02AB</b> = progestogens                                                                                                                                                                                                                                                                                                                                                           |     |               |                                                                                                                                                                                                                                                                                                                                                                                                                          |

|        |                                                                                                                                                                                                                                                                                                                                                                                                                 |     |                                                                                                                                                                                                      |  |  |                         |
|--------|-----------------------------------------------------------------------------------------------------------------------------------------------------------------------------------------------------------------------------------------------------------------------------------------------------------------------------------------------------------------------------------------------------------------|-----|------------------------------------------------------------------------------------------------------------------------------------------------------------------------------------------------------|--|--|-------------------------|
| H<br>1 | History of falling or<br>tendency to fall.                                                                                                                                                                                                                                                                                                                                                                      | and | benzodiazepines                                                                                                                                                                                      |  |  |                         |
|        | <b>ICPC A80 =</b><br>accident/injury<br><b>ICD9 E880 =</b><br>accidental fall on or<br>from stairs or steps<br><b>ICD9 E884 =</b><br>other accidental falls<br>from one level to<br>another<br><b>ICD9 E885 =</b><br>accidental fall on<br>same level from<br>slipping, tripping or<br>stumbling<br><b>ICD9 E887 =</b><br>fracture, cause<br>unspecified<br><b>ICD9 E888 =</b><br>other und unspecified<br>fall |     | <b>N03AE =</b><br>benzodiazepine<br>derivates<br><b>N05BA =</b><br>benzodiazepine<br>derivates<br><b>N05CD =</b><br>benzodiazepine<br>derivates<br><b>N05CF =</b><br>benzodiazepine<br>related drugs |  |  |                         |
| H<br>2 | History of falling or<br>tendency to fall.                                                                                                                                                                                                                                                                                                                                                                      | and | neuroleptic drugs                                                                                                                                                                                    |  |  | 1) Lithium is excluded. |
|        | <b>ICPC A80 =</b><br>accident/injury<br><br><b>ICD9 E880 =</b><br>accidental fall on or<br>from stairs or steps<br><b>ICD9 E884 =</b><br>other accidental falls<br>from one level to<br>another<br><b>ICD9 E885 =</b><br>accidental fall on same<br>level from slipping,                                                                                                                                        |     | <b>N05A =</b><br>antipsychotics<br><b>EXCEPT N05AN =</b><br>lithium                                                                                                                                  |  |  |                         |

|        |                                                                                                                                                                                                                                                                                                                                                                         |     |                                                                                                                                                                                                                                                                                                                                                                                              |                                                                                                                                                                                                                                                                                        |
|--------|-------------------------------------------------------------------------------------------------------------------------------------------------------------------------------------------------------------------------------------------------------------------------------------------------------------------------------------------------------------------------|-----|----------------------------------------------------------------------------------------------------------------------------------------------------------------------------------------------------------------------------------------------------------------------------------------------------------------------------------------------------------------------------------------------|----------------------------------------------------------------------------------------------------------------------------------------------------------------------------------------------------------------------------------------------------------------------------------------|
|        | tripping or stumbling<br><b>ICD9 E887</b> =<br>fracture, cause<br>unspecified<br><b>ICD9 E888</b> =<br>other und unspecified<br>fall                                                                                                                                                                                                                                    |     |                                                                                                                                                                                                                                                                                                                                                                                              |                                                                                                                                                                                                                                                                                        |
| H<br>3 | History of falling or<br>tendency to fall.                                                                                                                                                                                                                                                                                                                              | and | first-generation<br>antihistamines                                                                                                                                                                                                                                                                                                                                                           | 1) Please see Appendix 3 'Specification of included medication codes' in the<br>supplementary data on the journal website<br><a href="http://www.ageing.oxfordjournals.org/">http://www.ageing.oxfordjournals.org/</a> for a specification of the first-<br>generation antihistamines. |
|        | <b>ICPC A80</b> =<br>accident/injury                                                                                                                                                                                                                                                                                                                                    |     | <b>R06AA02,R06AA52</b><br><b>R06AA04,R06AA54</b><br><b>R06AB02,R06AB52</b><br><b>R06AB03,R06AB04</b><br><b>R06AB54,R06AC04</b><br><b>R06AD01,R06AD02</b><br><b>R06AD52,R06AD08</b><br><b>R06AE03,R06AE53</b><br><b>R06AE04,R06AE05</b><br><b>R06AE05,R06AE06</b><br><b>R06AX02,R06AX15</b><br><b>R06AX17 N05BB01</b><br><b>N05BB51,N07CA02</b><br><b>N07CA52</b> =<br>classic antihistamines |                                                                                                                                                                                                                                                                                        |
|        | <b>ICD9 E880</b> =<br>accidental fall on or<br>from stairs or steps<br><b>ICD9 E884</b> =<br>other accidental falls<br>from one level to<br>another<br><b>ICD9 E885</b> =<br>accidental fall on<br>same level from<br>slipping, tripping or<br>stumbling<br><b>ICD9 E887</b> =<br>fracture, cause<br>unspecified<br><b>ICD9 E888</b> =<br>other und unspecified<br>fall |     |                                                                                                                                                                                                                                                                                                                                                                                              |                                                                                                                                                                                                                                                                                        |

|        |                                                                                                                                                                                                                                                                                                                                                                                                  |     |                                                                                                     |     |                                                                                                                                                            |                                                                                                                                                                                                                                                                                                           |
|--------|--------------------------------------------------------------------------------------------------------------------------------------------------------------------------------------------------------------------------------------------------------------------------------------------------------------------------------------------------------------------------------------------------|-----|-----------------------------------------------------------------------------------------------------|-----|------------------------------------------------------------------------------------------------------------------------------------------------------------|-----------------------------------------------------------------------------------------------------------------------------------------------------------------------------------------------------------------------------------------------------------------------------------------------------------|
| H<br>4 | History of falling or tendency to fall.                                                                                                                                                                                                                                                                                                                                                          | and | long-term opiates                                                                                   |     |                                                                                                                                                            | <p>1) morphine as antipropulsives (A07DA52) codeine/morphine cough suppressant (R05DA04 and R05DA05) are excluded.</p> <p>2) Long-term opiates is defined as use of opiates during &gt; 1 month</p> <div> <div>Variables</div> <div>&gt; 1 month (use of opiates)</div> </div>                            |
|        | <p><b>ICPC A80</b> = accident/injury</p> <p><b>ICD9 E880</b> = accidental fall on or from stairs or steps</p> <p><b>ICD9 E884</b> = other accidental falls from one level to another</p> <p><b>ICD9 E885</b> = accidental fall on same level from slipping, tripping or stumbling</p> <p><b>ICD9 E887</b> = fracture, cause unspecified</p> <p><b>ICD9 E888</b> = other und unspecified fall</p> |     | <p><b>N02A</b> = Opioids</p>                                                                        |     |                                                                                                                                                            |                                                                                                                                                                                                                                                                                                           |
| H<br>5 | History of falling or tendency to fall.                                                                                                                                                                                                                                                                                                                                                          | and | persistent postural hypotension                                                                     | and | vasodilator drugs                                                                                                                                          | <p>1) Please see Appendix 3 'Specification of included medication codes' in the supplementary data on the journal website <a href="http://www.ageing.oxfordjournals.org/">http://www.ageing.oxfordjournals.org/</a> for a specification of all the included vasodilator drugs. Diuretics are excluded</p> |
|        | <p><b>ICPC A80</b> = accident/injury</p>                                                                                                                                                                                                                                                                                                                                                         |     | <p><b>ICPC K88</b> = orthostatic hypotension</p> <p><b>ICD9 458.0</b> = orthostatic hypotension</p> |     | <p><b>C02DB01, C02LG01, C02LG51, C02DB02, C02LG02, C02DC01</b> = direct vasodilators</p> <p><b>G04CA, C02CA04, C02CA06, C02KD01</b> = selective alpha1</p> |                                                                                                                                                                                                                                                                                                           |

|                                                                                                                                                                                                                                                                                                                                                                                                                                                                                                                                                                                    |                          |               |                                                                                                                                                                                                                  |                                  |                                                                                                                                                                                                                                                                                                                                                                                                                      |
|------------------------------------------------------------------------------------------------------------------------------------------------------------------------------------------------------------------------------------------------------------------------------------------------------------------------------------------------------------------------------------------------------------------------------------------------------------------------------------------------------------------------------------------------------------------------------------|--------------------------|---------------|------------------------------------------------------------------------------------------------------------------------------------------------------------------------------------------------------------------|----------------------------------|----------------------------------------------------------------------------------------------------------------------------------------------------------------------------------------------------------------------------------------------------------------------------------------------------------------------------------------------------------------------------------------------------------------------|
| <div> <div> <b>ICD9 E880 =</b><br/>accidental fall on or from stairs or steps<br/> <b>ICD9 E884 =</b><br/>other accidental falls from one level to another<br/> <b>ICD9 E885 =</b><br/>accidental fall on same level from slipping, tripping or stumbling<br/> <b>ICD9 E887 =</b><br/>fracture, cause unspecified<br/> <b>ICD9 E888 =</b><br/>other und unspecified fall </div> <div> receptorblockers<br/><br/> <b>C08 =</b><br/>calcium channel blockers (CCB)<br/> <b>C09C, C09D =</b><br/>AT<sub>II</sub> antagonists<br/> <b>C09A, C09B =</b><br/>ACE-inhibitor </div> </div> |                          |               |                                                                                                                                                                                                                  |                                  |                                                                                                                                                                                                                                                                                                                                                                                                                      |
| I<br>1                                                                                                                                                                                                                                                                                                                                                                                                                                                                                                                                                                             | Long term use of opiates | as<br>without | first-line therapy                                                                                                                                                                                               | and<br><br>mild to moderate pain | <p>1) First-line therapy is defined by the absence of other pain medication (according to the WHO pain ladder).</p> <p>2) No ICPC or ICD9 code for mild to moderate pain. Solution: excluding mild to moderate pain, although this can give false positive alerts.</p> <p>3) Long-term opiates is defined as use of opiates during &gt; 1 month</p> <div> <b>Variables</b><br/> &gt; 1 month (use of opiates) </div> |
|                                                                                                                                                                                                                                                                                                                                                                                                                                                                                                                                                                                    | <b>N02A =</b><br>opioids |               | <b>N02BE01, N02BE51</b><br><b>N02BE71 =</b><br>paracetamol + combinations<br><b>M01AA, M01AB, M01AC, M01AE, M01AG, M01AH, M01AX01 =</b><br>NSAID's<br><b>N02BA =</b><br>salicylic acid and derivates (analgesic) |                                  |                                                                                                                                                                                                                                                                                                                                                                                                                      |

|        |                          |     |                                                                                                                                                                                                                                                                                                                                                                                                                                                                                                                                                                                                                          |         |                                                                                           |                                                                                                                                                                                                                                                                                                                                                                                                                                                                                                                                                                                                                  |
|--------|--------------------------|-----|--------------------------------------------------------------------------------------------------------------------------------------------------------------------------------------------------------------------------------------------------------------------------------------------------------------------------------------------------------------------------------------------------------------------------------------------------------------------------------------------------------------------------------------------------------------------------------------------------------------------------|---------|-------------------------------------------------------------------------------------------|------------------------------------------------------------------------------------------------------------------------------------------------------------------------------------------------------------------------------------------------------------------------------------------------------------------------------------------------------------------------------------------------------------------------------------------------------------------------------------------------------------------------------------------------------------------------------------------------------------------|
| I<br>2 | Long term use of opiates | and | dementia                                                                                                                                                                                                                                                                                                                                                                                                                                                                                                                                                                                                                 | without | moderate-severe chronic pain or palliative care                                           | <p>1) No ICPC code for moderate-severe chronic pain and palliative care, solution: excluding moderate-severe chronic pain or palliative care although this can cause false positive alerts. The ICD9 codes are included and should be used.</p> <p>2) Long-term opiates is defined as use of opiates during &gt; 1 month</p> <p>3) Drug-induced persisting amnesic disorder (ICD 9 292.83) is excluded.</p> <p>4) Other cerebral degenerations (ICD 9 331) not complete group included. Exclusion of 331.3 (= communicating hydrocephalus), 331.4 (= obstructive hydrocephalus) and 331.81(=Reye's syndrome)</p> |
|        | <b>N02A</b> =<br>opioids |     | <b>ICPC P70</b> =<br>dementia/<br>Alzheimers<br><b>ICPC P20</b> =<br>amnesic/<br>concentration/<br>orientation disorder<br><br><b>ICD9 290</b> =<br>dementias<br><b>ICD9 291.1</b> =<br>alcohol induced<br>persisting amnesic<br>disorder<br><b>ICD9 291.2</b> =<br>alcohol induced<br>persisting dementia<br><b>ICD9 292.82</b> =<br>drug induced<br>persisting dementia<br><b>ICD9 294.1</b> =<br>dementia in<br>conditions classified<br>elsewhere<br><b>ICD9 294.2</b> =<br>dementia unspecified<br><b>ICD9 331</b> =<br>other cerebral<br>degenerations<br><b>Except</b><br><b>331.3 + 331.4 +</b><br><b>331.81</b> |         | <b>ICD9 338.4</b> =<br>chronic pain<br>syndrome<br><b>ICD9 V66.7</b> =<br>palliative care | <p><b>Variables</b></p> <p>&gt; 1 month (use of opiates)</p>                                                                                                                                                                                                                                                                                                                                                                                                                                                                                                                                                     |
| J      | -                        |     |                                                                                                                                                                                                                                                                                                                                                                                                                                                                                                                                                                                                                          |         |                                                                                           | <p>1) No specification has been made for this criterion. If criterion J would be specified as the first five identical characters in ATC code many false positive alerts would show up because many duplicate drug class prescriptions are considered to be appropriate, as for example double antibiotics, antidepressant or epileptics.</p>                                                                                                                                                                                                                                                                    |

## START criteria

## Considerations/solutions and other variables

|             |                                                               |         |                                                                                                          |  |  |                                                                                                                                                                             |
|-------------|---------------------------------------------------------------|---------|----------------------------------------------------------------------------------------------------------|--|--|-----------------------------------------------------------------------------------------------------------------------------------------------------------------------------|
| A<br>1      | Chronic heart failure                                         | without | ACE-inhibitor<br>or<br>angiotensin II receptor<br>blocker                                                |  |  | 1) The ICPC and ICD9 codes do not distinguish between systolic or diastolic heart failure. All heart failure is therefore included.                                         |
|             | ICPC K77 =<br>decompensatio cordis                            |         | C09A =<br>ACE-inhibitors, plain<br>C09B =<br>ACE-inhibitors,<br>combinations                             |  |  |                                                                                                                                                                             |
|             | ICD9 428 =<br>heart failure                                   |         | C09C =<br>angiotensin II<br>antagonists plain<br>C09D =<br>angiotensin II<br>antagonists<br>combinations |  |  |                                                                                                                                                                             |
| A<br>2<br>a | Diabetes with<br>proteinuria<br>(life expectancy<br>>10years) | without | ACE-inhibitor<br>or<br>angiotensin II receptor<br>blocker                                                |  |  | 1) Criterion is divided in 2 subcriteria because of the combined ICD9 code for DM with renal manifestations.<br><br>2) No ICPC or ICD9 code for life expectancy > 10 years. |
|             | ICD9 250.4 =<br>diabetes with renal<br>manifestations         |         | C09A =<br>ACE-inhibitors, plain<br>C09B =<br>ACE-inhibitors,<br>combinations                             |  |  | <b>Variables</b>                                                                                                                                                            |
|             |                                                               |         | C09C =<br>angiotensin II<br>antagonists plain<br>C09D =<br>angiotensin II<br>antagonists<br>combinations |  |  | Life expectancy > 10 years                                                                                                                                                  |

|             |                                                                                                                                                                                           |         |                                                                                                          |         |                                                                                                          |                                                         |
|-------------|-------------------------------------------------------------------------------------------------------------------------------------------------------------------------------------------|---------|----------------------------------------------------------------------------------------------------------|---------|----------------------------------------------------------------------------------------------------------|---------------------------------------------------------|
| A<br>2<br>b | Diabetes<br>(life expectancy<br>>10years)                                                                                                                                                 | and     | proteinuria                                                                                              | without | ACE-inhibitor<br>or<br>Angiotensin II<br>receptor blocker                                                | 1) No ICPC or ICD9 code for life expectancy > 10 years. |
|             | ICPC T90 =<br>diabetes mellitus<br>(type 1 + 2)                                                                                                                                           |         | ICPC U98.01 =<br>proteinuria                                                                             |         | C09A = ACE-<br>inhibitors, plain<br>C09B = ACE-<br>inhibitors,<br>combinations                           | Variables                                               |
|             | ICD9 250 =<br>diabetes mellitus<br>(type 1 + 2)                                                                                                                                           |         | ICD9 791.0 =<br>proteinuria                                                                              |         | C09C =<br>angiotensin II<br>antagonists plain<br>C09D =<br>angiotensin II<br>antagonists<br>combinations | Life expectancy > 10 years                              |
| A<br>3      | History of acute<br>myocardial infarction                                                                                                                                                 | without | ACE-inhibitor<br>or<br>angiotensin II receptor<br>blocker                                                |         |                                                                                                          |                                                         |
|             | ICPC K75 =<br>acute myocardial<br>infarction<br>ICPC K76 =<br>ischemic heart disease                                                                                                      |         | C09A =<br>ACE-inhibitors, plain<br>C09B =<br>ACE-inhibitors,<br>combinations                             |         |                                                                                                          |                                                         |
|             | ICD9 410 =<br>acute myocardial<br>infarction<br>ICD9 411 =<br>other acute and<br>subacute forms of<br>ischemic heart disease<br>ICD9 412 =<br>old myocardial<br>infarction<br>ICD 9 414 = |         | C09C =<br>angiotensin II<br>antagonists plain<br>C09D =<br>angiotensin II<br>antagonists<br>combinations |         |                                                                                                          |                                                         |

| other forms of chronic ischemic heart disease |                                                                                                                                                                                                                                                                                                             |         |                                                                                                              |  |                                                              |
|-----------------------------------------------|-------------------------------------------------------------------------------------------------------------------------------------------------------------------------------------------------------------------------------------------------------------------------------------------------------------|---------|--------------------------------------------------------------------------------------------------------------|--|--------------------------------------------------------------|
| A<br>4                                        | History of coronary, cerebral or peripheral vascular disease (Life expectancy > 5 years)                                                                                                                                                                                                                    | without | statin therapy                                                                                               |  | 1) No ICPC or ICD9 code for life expectancy > 5 years.       |
|                                               | <p><b>ICPC K74</b> = angina pectoris</p> <p><b>ICPC K75</b> = acute myocardial infarction</p> <p><b>ICPC K76</b> = ischemic heart disease</p> <p><b>ICPC K89</b> = transient cerebral ischemia</p> <p><b>ICPC K90.03</b> = cerebrovascular disease</p> <p><b>ICPC K92.01</b> = claudicatio intermittens</p> |         | <p><b>C10AA</b> = HMG CoA reductase inhibitors</p> <p><b>C10B</b> = lipid modifying agents, combinations</p> |  | <div>Variables</div> <div>Life expectancy &gt; 5 years</div> |

**ICD9 433 =**  
occlusion and stenosis  
of precerebral arteries

**ICD9 434 =**  
occlusion of cerebral  
arteries

**ICD9 435 =**  
transient cerebral  
ischemia

**ICD9 436 =**  
acute, but ill-defined,  
cerebrovascular  
disease.

**ICD 9 437 =**  
other and ill-defined  
cerebrovascular  
disease.

**ICD9 438 =** late effects  
of cerebrovascular  
disease

**ICD 9 444 =**  
arterial embolism and  
thrombosis

**ICD9 445 =**  
atheroembolism

A Systolic blood pressure without anti-hypertensive drug  
5 > 160 mmHg

**ICPC K85** =  
hypertension  
**ICPC K86** =  
without organ failure  
**ICPC K87** =  
with organ failure

**ICD9 401** =  
Essential hypertension  
**ICD9 405** =  
secondary  
hypertension

**C02AC01, C02LC01,**  
**C02LC51, C02AC05,**  
**C02LC05, C02AB,**  
**C02LB01, C02CA04,**  
**C02CA06, C02DB02,**  
**C02LG02, C02DB01,**  
**C02LG01, C02LG51,**  
**C02DC01, C02KD01**  
**C02LN, C02N** =  
antihypertensive  
drugs group C02  
**C03A, C03B, C03D,**  
**C03E, C03X** =  
diuretics (excl loop  
diuretics)  
**C07** =  
β-blocking agents  
**C08** =  
calcium channel  
blockers  
**C09** =  
agents acting on the  
rennin-angiotensin  
system

1) Please see Appendix 3 'Specification of included medication codes' in the supplementary data on the journal website  
<http://www.ageing.oxfordjournals.org/> STOPP criterion A3 for a specification of the included anti-hypertensives, excluding loop diuretics.

2) Systolic blood pressure > 160 mmHg is defined as hypertension because there are no ICPC or ICD9 codes for systolic blood pressure > 160 mmHg. However if the patient's systolic blood pressure is available this variable should be included instead of the ICPC or ICD9 code.

#### Variables

Systolic blood pressure > 160 mmHg

|   |                                           |         |                        |  |  |  |
|---|-------------------------------------------|---------|------------------------|--|--|--|
| A | Chronic heart failure                     | without | diuretics              |  |  |  |
| 6 | <b>ICPC K77</b> =<br>decompensatio cordis |         | <b>C03</b> = diuretics |  |  |  |
|   | <b>ICD9 428</b> =<br>heart failure        |         |                        |  |  |  |

A 7 Stable angina pectoris, without  $\beta$ -blocker  
acute myocardial infarction or (a stable patient with) chronic heart failure

**ICPC K74.02** =  
stable angina pectoris

**ICD9 413** =  
angina pectoris

**ICPC K75** =  
acute myocardial infarction

**ICPC K76** =  
ischemic heart disease

**ICD9 410** =  
acute myocardial infarction

**ICD9 411** =  
other acute and subacute forms of ischemic heart disease

**ICD9 412** =  
old myocardial infarction

**ICD 9 414** =  
other forms of chronic ischemic heart disease

**ICPC K77** =  
decompensatio cordis

**ICD9 428** =  
heart failure

**C07** =  
 $\beta$ - blocking agents

|        |                                                                                                                                                                                                                                                                                                                |                |                                                                                                                      |         |                                                                                                                                                                                                                                                                      |                                                                                                                                                                                                                                                                              |
|--------|----------------------------------------------------------------------------------------------------------------------------------------------------------------------------------------------------------------------------------------------------------------------------------------------------------------|----------------|----------------------------------------------------------------------------------------------------------------------|---------|----------------------------------------------------------------------------------------------------------------------------------------------------------------------------------------------------------------------------------------------------------------------|------------------------------------------------------------------------------------------------------------------------------------------------------------------------------------------------------------------------------------------------------------------------------|
| A<br>8 | Chronic atrial fibrillation                                                                                                                                                                                                                                                                                    | and            | contra-indication<br>oral anticoagulants                                                                             | without | acetylsalicylic acid/<br>carbasalate calcium                                                                                                                                                                                                                         | 1) No ATC code available for contra-indication for oral anticoagulants. Solution:<br>if patient's contra-indications are available use this information, if not available<br>do not program/use this criterion because it will give an iteration of START-<br>criterion A10. |
|        | <b>ICPC K78</b> =<br>atrial fibrillation and<br>flutter                                                                                                                                                                                                                                                        |                | <b>B01AA</b> =<br>vitamin K antagonists                                                                              |         | <b>B01AC06</b> =<br>acetylsalicylic acid<br><b>B01AC56</b> =<br>acetylsalicylic acid<br>+ esomeprazole<br><b>B01AC08</b> =<br>carbasalate<br>calcium                                                                                                                 | <b>Variables</b><br>Contra-indication oral anticoagulants (Vit. K<br>antagonists)                                                                                                                                                                                            |
| A<br>9 | History of coronary,<br>cerebral or peripheral<br>vascular disease                                                                                                                                                                                                                                             | and<br>without | <del>sinus rhythm</del><br>atrial fibrillation                                                                       | without | acetylsalicylic acid/<br>carbasalate calcium/<br>clopidogrel                                                                                                                                                                                                         | 1) There is no ICPC or ICD9 code for sinus rhythm. Sinus rhythm is now defined<br>by the absence of atrial fibrillation.                                                                                                                                                     |
|        | <b>ICPC K74</b> =<br>angina pectoris<br><b>ICPC K75</b> =<br>acute myocardial<br>infarction<br><b>ICPC K76</b> =<br>ischemic heart disease<br><b>ICPC K89</b> =<br>transient cerebral<br>ischemia<br><b>ICPC K90.03</b> =<br>cerebrovascular<br>disease<br><b>ICPC 92.01</b> =<br>intermittent<br>claudication |                | <b>ICPC K78</b> =<br>atrial fibrillation and<br>flutter<br><b>ICD9 427.3</b> =<br>atrial fibrillation and<br>flutter |         | <b>B01AC06</b> =<br>acetylsalicylic acid<br><b>B01AC30</b> =<br>acetylsalicylic acid<br>+ clopidogrel/<br>dipyridamol<br><b>B01AC56</b> =<br>acetylsalicylic acid<br>+ esomeprazole<br><b>B01AC08</b> =<br>carbasalate<br>calcium<br><b>B01AC04</b> =<br>clopidogrel |                                                                                                                                                                                                                                                                              |
|        | <b>ICD9 410 – 414</b> =<br>ischemic heart disease<br><b>ICD9 433 – 437</b> =<br>cerebrovascular<br>disease<br><b>ICD 9 444</b> =<br>arterial embolism and<br>thrombosis                                                                                                                                        |                |                                                                                                                      |         |                                                                                                                                                                                                                                                                      |                                                                                                                                                                                                                                                                              |



|        |                                                                                                            |         |                                                                                                                                                                |  |                                                                                                                                                              |
|--------|------------------------------------------------------------------------------------------------------------|---------|----------------------------------------------------------------------------------------------------------------------------------------------------------------|--|--------------------------------------------------------------------------------------------------------------------------------------------------------------|
| B<br>2 | Moderate-severe asthma/COPD (Gold III-V, FEV1<50% and frequent exacerbations)                              | without | regular inhaled corticosteroid                                                                                                                                 |  | 1) No ICPC or ICD9 code for COPD Gold III-V, predicted FEV1<50 and exacerbations                                                                             |
|        | <div>ICPC R91 = chronic bronchitis</div> <div>ICPC R95 = emphysema/COPD</div> <div>ICPC R96 = asthma</div> |         | <div>R03BA = glucocorticoids inhalants</div> <div>R03AK06 = salmeterol+ fluticson</div> <div>R03AK07 = formoterol+ beclomethason/ budesonide/ fluticason</div> |  | <div>Variables</div> <div>Severity of asthma (moderate/severe)</div> <div>Severity of COPD (GOLD III-V)</div> <div>FEV1&lt;50%, frequent exacerbations</div> |
| B<br>3 | Chronic respiratory failure                                                                                | without | home continuous oxygen                                                                                                                                         |  | 1) No ICPC code for chronic respiratory failure.                                                                                                             |
|        | ICD9 518.8= respiratory failure (chronic + acute)                                                          |         | V03AN01 = oxygen                                                                                                                                               |  |                                                                                                                                                              |
| C<br>1 | Parkinson's disease (with functional impairment and resultant disability)                                  | without | L-DOPA                                                                                                                                                         |  | 1) No ICD9 or ICPC code for functional impairment and disability resulting from Parkinson's disease. All Parkinson included.                                 |
|        | ICPC N87.01 = Parkinson's disease                                                                          |         |                                                                                                                                                                |  | <div>Variables</div> <div>Functional impairment and resultant disability</div>                                                                               |

|        |                                                                                                                                                                                                                                                                          |         |                                                                                                             |  |  |  |  |  |  |
|--------|--------------------------------------------------------------------------------------------------------------------------------------------------------------------------------------------------------------------------------------------------------------------------|---------|-------------------------------------------------------------------------------------------------------------|--|--|--|--|--|--|
|        | ICD9 332.0 =<br>Parkinson's disease                                                                                                                                                                                                                                      |         | N04BA02 =<br>levodopa +<br>benserazide/<br>carbidopa<br>N04BA03 =<br>levodopa +<br>carbidopa +<br>entacapon |  |  |  |  |  |  |
| C<br>2 | Depression<br>(according to DSM IV<br>and psychotherapy not<br>effective or wanted)                                                                                                                                                                                      | without | antidepressant drugs                                                                                        |  |  |  |  |  |  |
|        | ICPC P76 =<br>depression                                                                                                                                                                                                                                                 |         | N06A =<br>antidepressants                                                                                   |  |  |  |  |  |  |
|        | ICD9 296.2 =<br>major depressive<br>disorder single<br>episode<br>ICD9 296.3 =<br>major depressive<br>disorder, recurrent<br>episode.                                                                                                                                    |         |                                                                                                             |  |  |  |  |  |  |
| D<br>1 | Severe gastro-<br>oesophageal acid reflux<br>disease<br>or<br>peptic stricture<br>requiring dilatation<br><br>ICPC D84.02 =<br>esophageal reflux<br>without esophagitis<br>ICPC D84.03 =<br>esophageal reflux with<br>esophagitis<br>ICPC D84.05 =<br>esophagus-stenosis | without | protonpump inhibitor<br><br><br><br><br><br><br><br>A02BC =<br>proton pump<br>inhibitors                    |  |  |  |  |  |  |

**Variables**  
Psychotherapy not effective or wanted by the patient.

- ICD9 530.1 =**  
esophagitis
- ICD9 530.2 =**  
Ulcer of esophagus
- ICD9 530.3 =** Stricture  
and stenosis of  
esophagus
- ICD9 530.81 =**  
esophageal reflux
- ICD9 530.85 =**  
Barrett's esophagus

D  
2  
a

NSAID

and

history of peptic ulcer disease or complication from peptic ulcer disease.

without

PPI

**M01AA, M01AB,  
M01AC, M01AE,  
M01AG, M01AH,  
M01AX01 =  
NSAID's**

**N02BA =**  
salicylic acid and  
derivates (analgesic)

**ICPC D85 =**  
ulcus duodeni

**ICPC D86 =**  
other ulcer pepticum  
**ICPC D14 =**  
haematemesis  
**ICPC D15 =** melaena

**A02BC =**  
proton pump  
inhibitors

- ICD9 530.2** = ulcer of esophagus
- ICD9 530.82** = esophageal hemorrhage (due to ulcer)
- ICD9 531** = gastric ulcer
- ICD9 532** = duodenal ulcer
- ICD9 533** = peptic ulcer, site unspecified
- ICD9 534** = gastrojejunal ulcer

[illegible]

|             |                                                                                                                                                                  |     |                                                                                                                                                                                                                                                                                                                     |         |                                             |  |                                                                                   |
|-------------|------------------------------------------------------------------------------------------------------------------------------------------------------------------|-----|---------------------------------------------------------------------------------------------------------------------------------------------------------------------------------------------------------------------------------------------------------------------------------------------------------------------|---------|---------------------------------------------|--|-----------------------------------------------------------------------------------|
|             |                                                                                                                                                                  |     | dipyridamol<br><b>B01AC08</b> =<br>carbasalate calcium                                                                                                                                                                                                                                                              |         |                                             |  |                                                                                   |
| D<br>3<br>a | Acetylsalicylic acid or<br>carbasalate calcium<br>(low dose) and age > 60<br>years                                                                               | and | history of peptic ulcer<br>disease.                                                                                                                                                                                                                                                                                 | without | PPI                                         |  | 1) Not including the complications of peptic ulcer disease (unlike criterion D2a) |
|             | <b>B01AC06</b> =<br>acetylsalicylic acid<br><b>B01AC30</b> =<br>acetylsalicylic acid +<br>clopidogrel/<br>dipyridamol<br><b>B01AC08</b> =<br>carbasalate calcium |     | <b>ICPC D85</b> =<br>ulcus duodeni<br><b>ICPC D86</b> =<br>other ulcer pepticum<br><br><b>ICD9 530.2</b> =<br>ulcer of esophagus<br><b>ICD9 531</b> =<br>gastric ulcer<br><b>ICD9 532</b> =<br>duodenal ulcer<br><b>ICD9 533</b> =<br>peptic ulcer, site<br>unspecified<br><b>ICD9 534</b> =<br>gastrojejunal ulcer |         | <b>A02BC</b> =<br>proton pump<br>inhibitors |  | <b>Variables</b><br>Patients age > 60 years                                       |
| D<br>3<br>b | Acetylsalicylic acid or<br>carbasalate calcium<br>(low dose) and age > 70<br>years                                                                               | and | oral anticoagulants/<br>oral corticosteroid /<br>SSRI/                                                                                                                                                                                                                                                              | without | PPI                                         |  | <b>Variables</b><br>Patients age > 70 years                                       |
|             | <b>B01AC06</b> =<br>acetylsalicylic acid<br><b>B01AC30</b> =<br>acetylsalicylic acid +<br>clopidogrel/<br>dipyridamol<br><b>B01AC08</b> =<br>carbasalate calcium |     | <b>B01AA</b> =<br>Vitamin K antagonists<br><br><b>H02</b> =<br>corticosteroids for<br>systemic use                                                                                                                                                                                                                  |         | <b>A02BC</b> =<br>proton pump<br>inhibitors |  |                                                                                   |

|             |                                                                                                                                                                  |         |                                                                                                                                              |         |                            |  |                                                        |
|-------------|------------------------------------------------------------------------------------------------------------------------------------------------------------------|---------|----------------------------------------------------------------------------------------------------------------------------------------------|---------|----------------------------|--|--------------------------------------------------------|
|             |                                                                                                                                                                  |         | N06AB =<br>selective serotonin<br>reuptake inhibitors                                                                                        |         |                            |  |                                                        |
| D<br>3<br>c | Acetylsalicylic acid or<br>carbasalate calcium<br>(low dose) and age > 80<br>years                                                                               | without | PPI                                                                                                                                          |         |                            |  | Variables<br><br>Patients age > 80 years               |
|             | B01AC06 =<br>acetylsalicylic acid<br>B01AC30 =<br>acetylsalicylic acid +<br>clopidogrel/<br>dipyridamol<br>B01AC08 =<br>carbasalate calcium                      |         | A02BC =<br>proton pump<br>inhibitors                                                                                                         |         |                            |  |                                                        |
| D<br>4      | Chronic symptomatic<br>diverticular disease                                                                                                                      | and     | constipation                                                                                                                                 | without | fiber supplement           |  |                                                        |
|             | ICPC D92 =<br>diverticulosis/<br>diverticulitis<br><br>ICD9 562 =<br>diverticula of intestine                                                                    |         | ICPC D12 =<br>constipation<br><br>IDC9 564.0 =<br>constipation                                                                               |         | A06AC =<br>bulk -producers |  |                                                        |
| E<br>1      | Active moderate-severe<br>rheumatoid disease<br>(> 4 weeks)                                                                                                      | without | DMARD                                                                                                                                        |         |                            |  | Variables<br><br>> 4 weeks active (rheumatoid disease) |
|             | ICPC L88.01 =<br>reumatoid arthritis<br><br>ICD9 714.0 =<br>Rheumatoid arthritis<br>ICD9 714.2 = Other<br>rheumatoid arthritis<br>with visceral or<br>systematic |         | L04AX01 =<br>azathioprine<br>L04AX03 =<br>methotrexate<br>L04AA13 =<br>leflunomide<br>L04AD01 =<br>Ciclosporin<br>A07EC01 =<br>sulfasalazine |         |                            |  |                                                        |

|             |                                                                                                                               |         |                                                                                                                                                                                                                                                                                                                                                                                                                        |         |                                                                                                                                                                                                                                   |
|-------------|-------------------------------------------------------------------------------------------------------------------------------|---------|------------------------------------------------------------------------------------------------------------------------------------------------------------------------------------------------------------------------------------------------------------------------------------------------------------------------------------------------------------------------------------------------------------------------|---------|-----------------------------------------------------------------------------------------------------------------------------------------------------------------------------------------------------------------------------------|
|             | involvement                                                                                                                   |         | <b>P01BA</b> =<br>aminoquinolines<br><b>M01CB01</b> =<br>sodium<br>aurothiomalate<br><b>M01CB03</b> =<br>auranofin                                                                                                                                                                                                                                                                                                     |         |                                                                                                                                                                                                                                   |
| E<br>2      | Maintenance<br>corticosteroid therapy<br>(> 3 months)                                                                         | without | bisphosphonates                                                                                                                                                                                                                                                                                                                                                                                                        |         | 1) Excluding dermatologic and inhaled corticosteroids.                                                                                                                                                                            |
|             | <b>H02A</b> =<br>corticosteroids for<br>systemic use<br><b>H02B</b> =<br>corticosteroids for<br>systemic use,<br>combinations |         | <b>M05BA</b> =<br>bisphosphonates<br><b>M05BB</b> =<br>bisphosphonates,<br>combinations                                                                                                                                                                                                                                                                                                                                |         | <b>Variables</b><br>> 3 months (use of corticosteroids)                                                                                                                                                                           |
| E<br>3<br>a | Osteoporosis                                                                                                                  | or      | high risk for<br>osteoporosis                                                                                                                                                                                                                                                                                                                                                                                          | without | calcium                                                                                                                                                                                                                           |
|             | <b>ICPC L95</b> =<br>osteoporosis<br><br><b>ICD9 733.0</b> =<br>osteoporosis                                                  |         | <b>ICPC L72</b> =<br>fracture radius/ulna<br><b>ICPC L73</b> =<br>fracture tibia/fibula<br><b>ICPC L75</b> =<br>fracture of femur<br><b>ICPC L76.03</b> =<br>fracture of clavícula<br><b>ICPC L76.04</b> =<br>fracture of humerus<br><b>ICPC L76.05</b> =<br>fracture of rib<br><b>ICPC L76.06</b> =<br>fracture of spine<br><b>ICPC L76.07</b> =<br>fracture of pelvis<br><b>ICPC L76.08</b> =<br>fracture of patella |         | <b>A12AA</b> =<br>calcium<br><br><b>A12AX</b> =<br>calciumcarbonate<br>+<br>colecalfiferol<br><b>A12AX</b> =<br>calcium<br>triphosphate +<br>colcalciferol<br><b>A11JB</b> =<br>calciumcarbonate<br>+ vitamins<br>(calcevita)     |
|             |                                                                                                                               |         |                                                                                                                                                                                                                                                                                                                                                                                                                        |         | 1) If < 4 dairy consumptions a day.<br>2) Excluding ICD9 codes for fracture of phalanges of hand (ICD9 816) and foot (ICD9 826) and excluding fracture of the skull. (ICD9 800-804)<br>3) Excluding ICPC L74, Fracture hand/foot. |

|             |                                            |                                                                                                                                                                                                                     |                                                                                                                                                                                                |  |                                                                                       |
|-------------|--------------------------------------------|---------------------------------------------------------------------------------------------------------------------------------------------------------------------------------------------------------------------|------------------------------------------------------------------------------------------------------------------------------------------------------------------------------------------------|--|---------------------------------------------------------------------------------------|
|             |                                            |                                                                                                                                                                                                                     |                                                                                                                                                                                                |  |                                                                                       |
|             |                                            | <div> <b>ICD9 805-809 =</b><br/>fractures of spine and trunk<br/> <b>ICD9 810-819 =</b><br/>fracture of upper limb (EXCEPT ICD9 816)<br/> <b>ICD9 820-829 =</b><br/>fracture of lower limb (EXCEPT ICD9 826) </div> |                                                                                                                                                                                                |  |                                                                                       |
| E<br>3<br>b | women age > 50 years<br>men age > 70 years | without                                                                                                                                                                                                             | vitamin D                                                                                                                                                                                      |  |                                                                                       |
|             |                                            |                                                                                                                                                                                                                     | <div> <b>A11CC =</b><br/>vitamin D and analogues<br/> <b>A11CB =</b><br/>vitamin D + vitamin A </div>                                                                                          |  | <div> <b>Variables</b><br/> Women age &gt; 50 years<br/> Men age &gt; 70 years </div> |
|             |                                            |                                                                                                                                                                                                                     | <div> <b>A12AX =</b><br/>calciumcarbonate + colecalciferol<br/> <b>A12AX =</b><br/>calcium triphosphate + colcalciferol<br/> <b>A11JB =</b><br/>calciumcarbonate + vitamins (calcevita) </div> |  |                                                                                       |

|             |                                         |         |                                                                                                                                                                |  |  |  |  |  |                                              |
|-------------|-----------------------------------------|---------|----------------------------------------------------------------------------------------------------------------------------------------------------------------|--|--|--|--|--|----------------------------------------------|
| E<br>3<br>C | Men age < 70 years<br>With osteoporosis | without | Vitamin D                                                                                                                                                      |  |  |  |  |  |                                              |
|             | ICPC L95 =<br>osteoporosis              |         | A11CC =<br>vitamin D and<br>analogues<br>A11CB =<br>vitamin D + vitamin A                                                                                      |  |  |  |  |  | Variables<br>Men age < 70 years              |
|             | ICD9 733.0 =<br>osteoporosis            |         | A12AX =<br>calciumcarbonate +<br>colecalfiferol<br>A12AX =<br>calcium triphosphate +<br>colcalciferol<br>A11JB =<br>calciumcarbonate +<br>vitamins (calcevita) |  |  |  |  |  |                                              |
| F<br>1      | Diabetes mellitus type 2                | without | metformin                                                                                                                                                      |  |  |  |  |  | 1) including all the metformin combinations. |
|             | ICPC T90.02 = DM2                       |         | A10BA02 =<br>metformin                                                                                                                                         |  |  |  |  |  |                                              |
|             | ICD9                                    |         | A10BD02 =<br>metformin +<br>sulfanomides                                                                                                                       |  |  |  |  |  |                                              |
|             | 250.00, 250.02                          |         | A10BD03 =<br>metformin +<br>rosiglitazone                                                                                                                      |  |  |  |  |  |                                              |
|             | 250.10, 250.12                          |         | A10BD05 =<br>metformin +<br>pioglitazone                                                                                                                       |  |  |  |  |  |                                              |
|             | 250.20, 250.22                          |         | A10BD07 =<br>metformin +<br>sitagliptin                                                                                                                        |  |  |  |  |  |                                              |
|             | 250.30, 250.32                          |         | A10BD08 =<br>metformin +<br>vildagliptin                                                                                                                       |  |  |  |  |  |                                              |
|             | 250.40, 250.42                          |         | A10BD10 =<br>metformin +<br>saxagliptin                                                                                                                        |  |  |  |  |  |                                              |
|             | 250.50, 250.52                          |         | A10BD11 =                                                                                                                                                      |  |  |  |  |  |                                              |
|             | 250.60, 250.62                          |         |                                                                                                                                                                |  |  |  |  |  |                                              |
|             | 250.70, 250.72                          |         |                                                                                                                                                                |  |  |  |  |  |                                              |
|             | 250.80, 250.82                          |         |                                                                                                                                                                |  |  |  |  |  |                                              |
|             | 250.90, 250.92                          |         |                                                                                                                                                                |  |  |  |  |  |                                              |
|             | = DM2                                   |         |                                                                                                                                                                |  |  |  |  |  |                                              |

metformin +  
lingliptin  
**A10BD13** =  
metformin +  
alogliptin

[illegible]

|        |                                                 |         |                                                                                                    |  |  |  |                                                                                  |
|--------|-------------------------------------------------|---------|----------------------------------------------------------------------------------------------------|--|--|--|----------------------------------------------------------------------------------|
| F<br>3 | Diabetes mellitus                               | without | statin therapy                                                                                     |  |  |  |                                                                                  |
|        | ICPC T90 =<br>diabetes mellitus<br>(type 1 + 2) |         | C10AA =<br>HMG CoA reductase<br>inhibitors<br>C10B =<br>lipid modifying<br>agents,<br>combinations |  |  |  |                                                                                  |
|        | ICD9 250 =<br>diabetes mellitus<br>(type 1 + 2) |         |                                                                                                    |  |  |  |                                                                                  |
| G<br>1 | Opiates                                         | without | laxatives                                                                                          |  |  |  | 1) Codeine, cough suppressant also included because of the risk of constipation. |
|        | N02A =<br>Opioids<br>R05DA04 =<br>Codeine       |         | A06A =<br>drugs for<br>constipation                                                                |  |  |  |                                                                                  |
