# Supplementary material for: Specifying ICD9, ICPC and ATC codes for the STOPP/START criteria: a multidisciplinary consensus panel
Source: Oxford University Press journal article supplement (doi:10.1093/ageing/afu075), 2014-06-24
Supplement: afu075_supplementary_data.zip [file afu075_supplementary_data.zip › afu075supp_data3.pdf]

## Appendix 3 Specification of included medication codes

### STOPP criterion A3 *Loop diuretics as a first-line therapy for hypertension*

| <b>C02 anti-hypertensives *</b>                                                                                                                                                                                                                                                                                                                                                                                                                                                                                                                        | <b>C03 Diuretics (excl loop diuretics)</b>                                                                                                                                                   |
|--------------------------------------------------------------------------------------------------------------------------------------------------------------------------------------------------------------------------------------------------------------------------------------------------------------------------------------------------------------------------------------------------------------------------------------------------------------------------------------------------------------------------------------------------------|----------------------------------------------------------------------------------------------------------------------------------------------------------------------------------------------|
| C02AC01 = clonidine<br>C02LC01 = “, + diuretics<br>C02LC51 = “, + diuretics + other drugs<br>C02AC05 = moxonidine<br>C02LC05 = “, + diuretics<br>C02AB = methyldopa<br>C02LB01 = “, + diuretics<br>C02CA04 = doxazosin<br>C02CA06 = urapidil<br>C02DB02 = hydralazine<br>C02LG02 = “, + diuretics<br>C02DB01 = dihydralazine<br>C02LG01 = “ + diuretics<br>C02LG51 = “ + diuretics + combinations with other drugs<br>C02DC01 = minoxidil<br>C02KD01 = ketanserin<br>C02LN = “, + diuretics<br>C02N = combinations of antihypertensives in ATC-gr. C02 | C03A = low-ceiling diuretics, thiazides<br>C03B = low-ceiling diuretics, excl thiazides<br>C03D = potassium sparing agents<br>C03E = “, + diuretics in combination<br>C03X = other diuretics |
| <b>C07 = all beta- blockers</b>                                                                                                                                                                                                                                                                                                                                                                                                                                                                                                                        | <b>C08 =all Calcium channel blockers</b>                                                                                                                                                     |
| <b>C09 = all ACE-inhibitors + AT<sub>II</sub>-antagonists</b>                                                                                                                                                                                                                                                                                                                                                                                                                                                                                          |                                                                                                                                                                                              |

\* Included are those anti-hypertensives from group C02 which have an indication for essential hypertension and available in the Netherlands. The reason for no complete inclusion of the C02 group is the fact that, for example bosentan (C02KX01) has only an indication for pulmonary hypertension and not for essential hypertension, it would therefore be an incorrect inclusion.

#### References:

1. Dutch pharmacotherapeutic database ([www.fk.cvz.nl](http://www.fk.cvz.nl))
2. [www.who.org](http://www.who.org) ATC/DDD index

**STOPP criterion A4**      *thiazide diuretic with a history of gout*

| Thiazide diuretic and combinations *      |                                                     |
|-------------------------------------------|-----------------------------------------------------|
| C03EA01 = triamtereen/hydrochlorothiazide | C09DA01 = losartan/hydrochlorothiazide              |
| C03EA01 = amiloride/hydrochlorothiazide   | C09DA02 = eprosartan/hydrochlorothiazide            |
| C07BB02 = metoprolol/hydrochlorothiazide  | C09DA03 = valsartan/hydrochlorothiazide             |
| C07BB07 = bisoprolol/hydrochlorothiazide  | C09DA04 = irbesartan/hydrochlorothiazide            |
| C09BA01 = captopril/hydrochlorothiazide   | C09DA06 = candesartan/hydrochlorothiazide           |
| C09BA02 = enalapril/hydrochlorothiazide   | C09DA07 = telmisartan/hydrochlorothiazide           |
| C09BA03 = lisinopril/hydrochlorothiazide  | C09DA08 = olmesartan/hydrochlorothiazide            |
| C09BA05 = ramipril/hydrochlorothiazide    | C09DX01 = amlodipine/valsartan/hydrochlorothiazide  |
| C09BA06 = quinapril/hydrochlorothiazide   | C09DX03 = olmesartan/amlodipine/hydrochlorothiazide |
| C09BA09 = fosinopril/hydrochlorothiazide  | C09XA52 = aliskiren/hydrochlorothiazide             |
|                                           | C03AA03 = hydrochlorothiazide                       |

\* Included are those thiazide diuretics and combinations available in the Netherlands. The reason for this is the fact that the WHO ATC database refers to combinations without a specification of the combination. For example C09DA06 = candesartan + diuretics according to the WHO database, according to the Dutch pharmacotherapeutic database C09DA06 = candesartan/hydrochlorothiazide. Because in this STOPP criterion we only want to include the thiazide diuretics (to minimize the false positive alerts) Therefore we followed in this criterion the Dutch database en could only include those available in the Netherlands.

References:

1. Dutch pharmacotherapeutic database ([www.fk.cvz.nl](http://www.fk.cvz.nl))
2. [www.who.org](http://www.who.org) ATC/DDD index

**STOPP criterion B7**      *Long-term (> 1 month) long-acting benzodiazepines.*

| Long-acting benzodiazepines | Elimination half-life (hrs) |
|-----------------------------|-----------------------------|
| N05BA08 bromazepam          | 15-22                       |
| N05BA02 chlordiazepoxide    | 5-30 (42-100)*              |
| N05BA09 clobazam            | 18 (42)*                    |
| N05BA05 clorazepate         | 2-3 (42-100)*               |
| N05BA01 diazepam            | 20-48 (42-100)*             |
| N05CD01 flurazepam          | 47-100                      |
| N05CD02 nitrazepam          | 18-34                       |
| N05CD03 flunitrazepam       | 16-35                       |
| N05BA11 prazepam            | 42-100                      |

\*In parenthesis the elimination half-life of active metabolites

Decided was to consider benzodiazepines as long acting if they have a half of life of 15 hours or more.

References:

- 1) Dutch pharmacotherapeutic database ([www.fk.cvz.nl](http://www.fk.cvz.nl))
- 2) Gray SL, LaCroix AZ, Hanlon JT *et al.* Benzodiazepine use and physical disability in community-dwelling older adults. J Am Geriatr Soc 2006; 54: 224-230

3) [www.who.org](http://www.who.org) ATC/DDD index

**STOPP criterion B13** *Classic antihistamines during > 1 week.*

In the Netherlands the list of classic antihistamines is the following, plus the antihistamines particularly named in the Irish version. (diphenhydramine, chlorpheniramine, cyclizine, promethazine)

| <b>Classic antihistamines</b><br>(= First-generation histamines / sedating antihistamines)                                                                                                                                                                                                                                                                                                      |                                                                                                                                                                                                                                                                                                                                                  |
|-------------------------------------------------------------------------------------------------------------------------------------------------------------------------------------------------------------------------------------------------------------------------------------------------------------------------------------------------------------------------------------------------|--------------------------------------------------------------------------------------------------------------------------------------------------------------------------------------------------------------------------------------------------------------------------------------------------------------------------------------------------|
| R06AA02 = diphenhydramine<br>R06AA52 = “, combinations<br>R06AA04 = clemastine<br>R06AA54 = “, combinations<br>R06AB02 = dexchlorpheniramine<br>R06AB52 = “, combinations<br>R06AB03 = dimetindene<br>R06AB04 = chlorphenamine<br>R06AB54 = “, combinations<br>R06AC04 = tripelemamine<br>R06AD01 = alimemazine<br>R06AD02 = promethazine<br>R06AD52 = “, combinations<br>R06AD08 = oxomemazine | R06AE03 = cyclizine<br>R06AE53 = “, combinations<br>R06AE04 = chlorcyclizine<br>R06AE05 = meclozine<br>R06AE05 = “, combinations.<br>R06AE06 = oxatomide<br>R06AX02 = cyproheptadine<br>R06AX15 = mebhydrolin<br>R06AX17 = ketotifen<br>N05BB01 = hydroxyzine<br>N05BB51 = “, combinations<br>N07CA02 = cinnarizine<br>N07CA52 = “, combinations |

References:

- 1) Dutch pharmacotherapeutic database ([www.fk.cvz.nl](http://www.fk.cvz.nl))
- 2) [www.drugbank.ca](http://www.drugbank.ca)
- 3) [www.who.org](http://www.who.org) ATC/DDD index
- 4) Dutch informatorium medicamentorum

**STOPP criterion E1** *NSAID with moderate-severe hypertension*

M01AX (other anti-inflammatory and anti-rheumatic agents, non-steroids) is not included as complete group because for example M01AX26 stands for soyabean oil. Nabumetone is the only one available in the Netherlands and therefore included. The other NSAID's are included as a complete group, including those not available in the Netherlands. This results in the following table.

| <b>NSAID's included</b>                                                                                                                                                                                                                                             |
|---------------------------------------------------------------------------------------------------------------------------------------------------------------------------------------------------------------------------------------------------------------------|
| M01AA = butylpyrazolidines<br>M01AB = acetic acid derivatives and related substances<br>M01AC = oxicams<br>M01AE = propionic acid derivatives<br>M01AG = fenamates<br>M01AH = coxibs<br>M01AX01 = nabumetone<br>N02BA = salicylic acid and derivatives (analgesics) |

References:

1. Dutch pharmacotherapeutic database ([www.fk.cvz.nl](http://www.fk.cvz.nl))

2. [www.who.org](http://www.who.org) ATC/DDD index
3. [www.drugbank.ca](http://www.drugbank.ca)

**STOPP criterion F5** *selective alpha1-blockers in men with one or more episodes of incontinence daily.*

| Selective alpha-1-receptor blockers |
|-------------------------------------|
| G04CA01 = alfuzosin                 |
| G04CA02 = tamsulosin                |
| G04CA03 = terazosin                 |
| G04CA04 = silodosin                 |
| G04CA51 = alfuzosin/finasteride     |
| G04CA52 = tamsulosin/dutasteride    |
| G04CA53 = tamsulosin/solifenacin    |
| C02CA04 = doxazosin *               |
| C02CA06 = urapidil *                |
| C02KD01 = ketanserine*              |

Group G04CA = alpha-1 receptor antagonists (indication benign prostatic hypertrophy)

\* = selective alpha-1 receptor antagonists (indication hypertension)

References:

1. Dutch pharmacotherapeutic database ([www.fk.cvz.nl](http://www.fk.cvz.nl))
2. [www.who.org](http://www.who.org) ATC/DDD index
3. Dutch multidisciplinary guideline Polypharmacy in the elderly. NHG 2012
4. [www.drugbank.ca](http://www.drugbank.ca)

**STOPP criterion G3+ G4** *Oestrogens with a history of breast cancer or venous thrombo-embolism. +*

**STOPP criterion G5** *Oestrogens without progestogen in patients with a intact uterus.*

| Oestrogens                                                     |
|----------------------------------------------------------------|
| G03AA = progestogens and estrogens; fixed combinations         |
| G03AB = progestogens and estrogens; sequential preparations    |
| G03C = estrogens                                               |
| G03EA = androgens and estrogens                                |
| G03EB = androgens, progestogens and estrogens                  |
| G03F = progestogens and estrogens                              |
| G03HB = anti-androgens and estrogens                           |
| L02AA = estrogens (antineoplastic and immunomodulating agents) |
| G03XC01= raloxifene *                                          |
| G03XC02= bazedoxifene*                                         |

\* selective estrogen receptor modulators (estrogen agonistic effect on bone and cholesterol, complete estrogen antagonist effect on mammary gland and uterine tissue) therefore not included in criterion G3(breastcancer) but included in criterion G4. (venous thrombo-embolism) Although there is an antagonistic effect on the uterine tissue, raloxifene and bazedoxifene are contraindicated for endometrium carcinoma because of the lack of safety evidence. Therefore they are both included for criterion G5.

|                                                                   |
|-------------------------------------------------------------------|
| <b>Progestogens</b>                                               |
| G03A = progestogens (hormonal contraceptives for systemic use)    |
| G03D = progestogens                                               |
| G03EB = androgens, progestogens and estrogens                     |
| G03F = progestogens and estrogens                                 |
| G02BA03 = plastic IUD with progestogen                            |
| G02BB01 = vaginal ring with progestogen and estrogen              |
| L02AB = progestogens (antineoplastic and immunomodulating agents) |

References:

1. Dutch pharmacotherapeutic database ([www.fk.cvz.nl](http://www.fk.cvz.nl))
2. [www.who.org](http://www.who.org) ATC/DDD index
3. [www.drugbank.ca](http://www.drugbank.ca)

**STOPP criterion H5**      *Vasodilator drugs with a history of postural hypotension*

| <b>Vasodilator drugs. *</b>                                                                                                                                                                                                                                                |                                                                                                                                                                                          |
|----------------------------------------------------------------------------------------------------------------------------------------------------------------------------------------------------------------------------------------------------------------------------|------------------------------------------------------------------------------------------------------------------------------------------------------------------------------------------|
| <i>Selective alpha-1-receptorblockers</i>                                                                                                                                                                                                                                  | <i>Direct vasodilators</i>                                                                                                                                                               |
| G04CA01 = alfuzosin<br>G04CA02 = tamsulosin<br>G04CA03 = terazosin<br>G04CA04 = silodosin<br>G04CA51 = alfuzosin/finasteride<br>G04CA52 = tamsulosin/dutasteride<br>G04CA53 = tamsulosin/solifenacin<br>C02CA04 = doxazosin<br>C02CA06 = urapidil<br>C02KD01 = ketanserine | C02DB01 = dihydralazine<br>C02LG01 = " + diuretics<br>C02LG51 = " + diuretics + combinations with other drugs<br>C02DB02 = hydralazine<br>C02LG02 = " + diuretics<br>C02DC01 = minoxidil |
| <i>AT<sub>II</sub>-antagonists</i>                                                                                                                                                                                                                                         | <i>ACE-inhibitors</i>                                                                                                                                                                    |
| C09C = AT <sub>II</sub> -antagonists<br>C09D = AT <sub>II</sub> -antagonists + combinations                                                                                                                                                                                | C09A = ACE-inhibitor<br>C09B = ACE-inhibitor + combinations                                                                                                                              |
| C08 = <i>Calcium channel blockers (CCB)</i>                                                                                                                                                                                                                                |                                                                                                                                                                                          |

\* C04 = peripheral vasodilators are not included.

\* C01DA = organic nitrates; nitrates are also (strong) vasodilators, but should not be included in this particular criterion. The indication for nitrates ((acute)angina pectoris and (acute) heartfailure) outweighs the risk of postural hypotension and is therefore excluded.

References:

- 1) Dutch pharmacotherapeutic database ([www.fk.cvz.nl](http://www.fk.cvz.nl))
- 2) Dutch multidisciplinary guideline Polypharmacy in the elderly. NHG 2012
- 3) [www.who.org](http://www.who.org) ATC/DDD index
